# Supplementary material
Source: PubMed Central journal article supplement (PMC8754100)
Supplement: ehp9373.s001.acco.pdf [file ehp9373.s001.acco.pdf]

**Note to readers with disabilities:** *EHP* strives to ensure that all journal content is accessible to all readers. However, some figures and Supplemental Material published in *EHP* articles may not conform to [508 standards](#) due to the complexity of the information being presented. If you need assistance accessing journal content, please contact [ehp508@niehs.nih.gov](mailto:ehp508@niehs.nih.gov). Our staff will work with you to assess and meet your accessibility needs within 3 working days.

### **Supplemental Material**

#### **Role of Hepatocyte- and Macrophage-Specific PPAR $\gamma$ in Hepatotoxicity Induced by Diethylhexyl Phthalate in Mice**

Miao Xu, Yongning Li, Xiaohong Wang, Qiannan Zhang, Lei Wang, Xin Zhang, Wenming Cui, Xiaomin Han, Ning Ma, Haishan Li, Hongyun Fang, Song Tang, Jingguang Li, Zhaoping Liu, Hui Yang, and Xudong Jia

#### **Table of Contents**

**Table S1.** Key reagents and materials.

**Table S2.** Liver weight and liver index in DEHP treated mice [mean  $\pm$  SD; n=10/group].

**Table S3.** Concentration of MEHP in plasma and liver of DEHP treated mice [mean  $\pm$  SD (n)].

**Table S4.** Clinical chemistry panel of DEHP treated mice [mean  $\pm$  SD; n=5/group].

**Table S5.** Concentration of hepatic TG in DEHP treated mice [mean  $\pm$  SD; n=5/group].

**Table S6.** Hepatic pathological severity and oil red staining evaluation in DEHP treated mice [evaluating scores; mean  $\pm$  SD; n=6/group].

**Table S7.** Fatty acid uptake and lipid accumulation evaluation in MEHP treated HepG2 cells [Mean stain area ( $\mu\text{m}^2$ ) (% of control); mean  $\pm$  SD; n=4/treatment].

**Table S8.** Data for Figure 2A: Binding affinity analysis of PPAR $\alpha$  [Resonance units (RU); n=2006-2146; provided as [Excel Table S8](#)].

**Table S9.** Data for Figure 2A: Binding affinity analysis of PPAR $\gamma$  [Resonance units (RU); n=1583-2131; provided as [Excel Table S9](#)].

**Table S10.** PPRE and CD36 response in PPRE-THP-1 cells derived macrophages [positive cells (%); mean $\pm$ SD; n=6 sites/treatment].

**Table S11.** Dose response curves of PPRE in PPRE-THP-1 cells derived macrophages [mean stain area ( $\mu\text{m}^2$ ); mean; n=3/treatment].

**Table S12.** Dose response curve of CD36 in PPRE-THP-1 cells derived macrophages [mean stain area ( $\mu\text{m}^2$ ); mean, n=3/treatment].

**Table S13.** Dose response curve of PPRE and CD36 in MEHP treated macrophages with/without PPAR $\alpha/\gamma$  antagonists [mean stain area ( $\mu\text{m}^2$ ); mean, n=3/treatment].

**Table S14.** Liver weight and liver index in WT and Hep-KO mice [mean  $\pm$  SD (n)].

**Table S15.** Clinical chemistry panel in WT and Hep-KO mice [mean  $\pm$  SD (n)].

**Table S16.** Concentration of hepatic TG in WT and Hep-KO mice [ $\mu\text{g}/\text{mg}$  tissue; mean  $\pm$  SD (n)].

**Table S17.** Hepatic pathological severity evaluation in WT and Hep-KO mice [evaluating scores; mean  $\pm$  SD (n)].

**Table S18.** Macrophages evaluation in liver sections from WT and Hep-KO mice [cell number per site; mean  $\pm$  SD (n)].

**Table S19.** Liver weight and liver index in WT and Mac-KO mice [mean  $\pm$  SD; n=5/group].

**Table S20.** Concentration of hepatic TG in WT and Mac-KO mice [ $\mu\text{g}/\text{mg}$  tissue; mean  $\pm$  SD; n=5/group].

**Table S21.** Hepatic pathological severity and oil red staining evaluation in WT and Mac-KO mice [evaluating scores; mean  $\pm$  SD; n=5/group].

**Table S22.** M2 macrophages analysis in liver of WT and Mac-KO mice using flow cytometry [% of CD45<sup>+</sup> cells; mean  $\pm$  SD; n=5/group].

**Table S23.** Macrophages evaluation in liver sections from WT and Mac-KO mice [cell number per site; mean  $\pm$  SD; n=5/group].

**Table S24.** Monocyte evaluation in liver from WT and Mac-KO mice [% of CD45<sup>+</sup> cells; mean  $\pm$  SD; n=5/group].

**Table S25.** M2 macrophages polarization evaluation in BMDM from WT and Mac-KO mice [CD206<sup>+</sup> cells (%); mean  $\pm$  SD; n=15 technical replicates/treatment].

**Table S26.** Relative expression of DEGs associated with M2 macrophages in MEHP treated macrophages [Z scores; n=3/treatment; provided as [Excel Table S26](#)].

**Table S27.** Relative expression of DEGs associated with PPAR pathway in MEHP treated macrophages [Z scores; n=3/treatment; provided as [Excel Table S27](#)].

**Table S28.** Characteristics of PPRE-THP-1 cells derived M2 macrophages [Mean stain area ( $\mu\text{m}^2$ ); mean  $\pm$  SD; n=2/subtype].

**Table S29.** Dose response curves of PPRE/CD209/LD in DEHP/MEHP treated M2 macrophages [% of control; mean, n=3/treatment].

**Table S30.** Data for Figure 5G: Dose response curves of CD209 in PPAR $\alpha/\gamma$  agonists treated M2 macrophages [Mean stain area ( $\mu\text{m}^2$ ); mean; n=3/treatment].

**Table S31.** Data for Figure 5H: Dose response curves of CD209 in PPAR $\alpha/\gamma$  antagonists treated M2 macrophages [Mean stain area ( $\mu\text{m}^2$ ); mean, n=3/treatment].

**Table S32.** Response of CD209/CD36/LD in MEHP treated M2 macrophages with/without PPAR $\alpha/\gamma$  antagonists [Mean stain area ( $\mu\text{m}^2$ ); mean  $\pm$  SD (n)].

**Table S33.** Data for Figure 6A: Transcriptomic profiling of livers from different mice models [DEGs; provided as [Excel Table S33](#)].

**Table S34.** Data for Figure 6B: Relative expression of DEGs associated with lipid metabolism in liver from different mice models [Z scores; n=4-6/group; provided as [Excel Table S34](#)].

**Table S35.** Pathway enrichment analysis of DEGs in liver from different mice models [enrichment scores].

**Table S36.** Data for Figure 6D: GO analysis of DEGs in livers from different mice models [provided as [Excel Table S36](#)].

**Table S37.** Superclass constitution of lipid metabolites in liver from different mice models [lipid counts; average ratio (DEHP/CT ratio)].

**Table S38.** Data for Figure 6F: Class constitution of lipid metabolites in livers from different mice models [lipid counts; average ratio (DEHP/CT ratio); provided as [Excel Table S38](#)].

**Table S39.** Evaluation of mitochondrial OXPHOS, fatty acid uptake and LD in HepG2 cells treated with MEHP with/without specific inhibitors [Mean stain area ( $\mu\text{m}^2$ ); mean $\pm$ SD; n=5/treatment].

**Table S40.** Evaluation of mitochondrial OXPHOS and LD in HepG2 cells treated with MEHP with/without M2 macrophages [Mean stain area ( $\mu\text{m}^2$ ); mean  $\pm$  SD; n=5/treatment].

**Table S41.** Relative expression of DEGs associated with OXPHOS in HepG2 cells treated with MEHP with/without M2 macrophages [Z scores; n=2/treatment].

**Table S42.** Relative expression of DEGs associated with glycolysis in HepG2 cells treated with MEHP with/without M2 macrophages [Z scores; n=3/treatment].

**Table S43.** Relative expression of DEGs associated with lipid metabolism in HepG2 cells treated with MEHP with/without M2 macrophages [Z scores; n=3/treatment].

**Table S44.** Body weight fluctuation in DEHP treated mice [g; mean  $\pm$  SD; n=10/group].

**Table S45.** Data for Figure S2B: Enriched KEGG pathways (level 2) in DEHP treated mice [number of genes; provided as [Excel Table S45](#)].

**Table S46.** Relative expression of DEGs associated with lipid metabolism in HepG2 cells treated with MEHP [Z scores; n=3/treatment].

**Table S47.** Relative expression of DEGs associated with PPAR pathway in DEHP treated mice [Z scores; n=6/group; provided as [Excel Table S47](#)].

**Table S48.** Pathway enrichment analysis of DEGs in HepG2 cells treated with MEHP [n=3/treatment].

**Table S49.** Clinical chemistry panel in WT and Mac-KO mice [mean  $\pm$  SD (n)].

**Table S50.** Macrophages and neutrophils analysis in liver of WT and Mac-KO mice using flow cytometry [% of CD45<sup>+</sup> cells; mean  $\pm$  SD (n)].

**Table S51.** Macrophages featured cytokines analysis in liver of WT and Mac-KO mice using flow cytometry [pg/mg protein; mean  $\pm$  SD; n=5].

**Table S52.** CD69<sup>+</sup> M1 macrophages evaluation in BMDM from WT and Mac-KO mice [mean stain area ( $\mu\text{m}^2$ ); mean $\pm$ SD (n)].

**Table S53.** Relative expression of DEGs associated with M1 macrophages in MEHP treated macrophages [Z scores; n=3/treatment; provided as [Excel Table S53](#)].

**Table S54.** Macrophages lipid metabolism analysis in liver of WT and Mac-KO mice using flow cytometry [% of CD45<sup>+</sup> cells; mean  $\pm$  SD; n=5/treatment].

**Figure S1.** Gating strategy for flow cytometry of mouse liver.

**Figure S2.** The effect of DEHP on hepatic lipid metabolism.

**Figure S3.** Activation of PPAR isoforms by DEHP and MEHP at the molecular level.

**Figure S4.** The function of PPAR $\gamma$  in hepatic macrophages.

**Figure S5.** The effects of DEHP and MEHP on Macrophages polarization.

**Additional File-** Excel Document

**Table S1** Key reagents and materials

| REAGENT or RESOURCE                                                                          | SOURCE                    | IDENTIFIER                           |
|----------------------------------------------------------------------------------------------|---------------------------|--------------------------------------|
| <b>Antibodies</b>                                                                            |                           |                                      |
| PE anti-human CCR7 (clone#G043H7, FACS: 2 $\mu$ l /10 <sup>6</sup> cells)                    | Biolegend                 | Cat#353204,<br>RRID: AB_10913813     |
| Alexa Fluor® 647 anti-human CCR7 (clone#G043H7, FACS: 2 $\mu$ l /10 <sup>6</sup> cells)      | Biolegend                 | Cat#353218;<br>RRID: AB_10917385     |
| PE anti-human CD209 (clone#9E9A8, FACS: 2 $\mu$ l /10 <sup>6</sup> cells)                    | Biolegend                 | Cat#330106;<br>RRID:AB_1134052       |
| FITC anti-human CD209 (clone#9E9A8, FACS: 2 $\mu$ l /10 <sup>6</sup> cells)                  | Biolegend                 | Cat#330104;<br>RRID:AB_1134048       |
| PE anti-human CD36 antibody(clone#AC106, FACS: 2 $\mu$ l /10 <sup>6</sup> cells)             | Miltenyi                  | Cat#130-095-472;<br>RRID:AB_10827705 |
| PE anti-mouse CD206 (clone#C068C2, FACS: 0.5 $\mu$ g /10 <sup>6</sup> cells)                 | Biolegend                 | Cat#141706;<br>RRID:AB_10895754      |
| APC anti-mouse CD206 (clone#C068C2, FACS: 0.5 $\mu$ g /10 <sup>6</sup> cells)                | Biolegend                 | Cat#141708;<br>RRID:AB_10900231      |
| FITC anti-mouse CD206 (clone#C068C2, FACS: 0.5 $\mu$ g /10 <sup>6</sup> cells)               | Biolegend                 | Cat#141704;<br>RRID:AB_10901166      |
| Alexa Fluor® 647 anti-mouse CD69 (clone#H1.2F3, FACS: 0.25 $\mu$ g /10 <sup>6</sup> cells)   | Biolegend                 | Cat#104518;<br>RRID:AB_492847        |
| APC anti-mouse CD36 (clone#HM36, FACS: 0.25 $\mu$ g /10 <sup>6</sup> cells)                  | Biolegend                 | Cat#102612;<br>RRID:AB_2072639       |
| PerCP/Cyanine5.5 anti-CD11b (clone#M1/70, FACS: 0.25 $\mu$ g /10 <sup>6</sup> cells)         | Biolegend                 | Cat#123126;<br>RRID:AB_893483        |
| PE anti-mouse F4/80(Clone#BM8, FACS: 0.5 $\mu$ g /10 <sup>6</sup> cells)                     | Biolegend                 | Cat#123110;<br>RRID:AB_893486        |
| PerCP anti-mouse F4/80(Clone#BM8, FACS: 0.5 $\mu$ g /10 <sup>6</sup> cells)                  | Biolegend                 | Cat#123126;<br>RRID:AB_893483        |
| PerCP/Cyanine5.5 anti-mouse CD45 (clone#30-F11, FACS: 0.25 $\mu$ g /10 <sup>6</sup> cells)   | Biolegend                 | Cat#103132;<br>RRID:AB_893340        |
| FITC anti-mouse CD45 (clone#30-F11, FACS: 0.25 $\mu$ g /10 <sup>6</sup> cells)               | Biolegend                 | Cat#103108;<br>RRID:AB_312973        |
| APC Anti-mouse CD45 (clone#30-F11, FACS: 0.25 $\mu$ g /10 <sup>6</sup> cells)                | Biolegend                 | Cat#103112;<br>RRID:AB_312977        |
| PE anti-mouse CCR2 (clone# SA203G11, FACS: 0.5 $\mu$ g /10 <sup>6</sup> cells)               | Biolegend                 | Cat#150610;<br>RRID:AB_2616982       |
| Alexa Fluor® 647 anti-mouse CCR2 (clone# SA203G11, FACS: 0.5 $\mu$ g /10 <sup>6</sup> cells) | Biolegend                 | Cat#150604;<br>RRID:AB_2566140       |
| APC anti-mouse LY6C (clone#HK1.4, FACS: 0.1 $\mu$ g /10 <sup>6</sup> cells)                  | Biolegend                 | Cat# 128016;<br>RRID:AB_1732076      |
| PPAR $\gamma$ rabbit mAb (clone# C26H12, IHC:1/200)                                          | Cell Signaling Technology | Cat#2435S;<br>RRID:AB_2166051        |

|                                                             |                              |                                    |
|-------------------------------------------------------------|------------------------------|------------------------------------|
| Ki-67 rabbit mAb (clone# D3B5, IHC:1/200)                   | Cell Signaling<br>Technology | Cat#12202;<br>RRID:AB_2620142      |
| F4/80 rabbit mAb (clone# D4C8V, IHC:1/200)                  | Cell Signaling<br>Technology | Cat#30325;<br>RRID:AB_2798990      |
| PPAR alpha polyclonal antibody(IHC:1/200)                   | Invitrogen                   | Cat#PA1-822A;<br>RRID:AB_2165595   |
| Mouse CLEC4F/CLECSF13 antibody(IHC:1/200)                   | R&D systems                  | Cat#AF2784;<br>RRID:AB_2081339     |
| Mouse IL-1ra/IL-1F3 antibody (clone# 962802, IHC: 10 µg/ml) | R&D systems                  | Cat#MAB4802;<br>N/A                |
| COX7A2L Rabbit Polyclonal antibody(IHC: 1/100)              | Proteintech                  | Cat#11416-1-AP;<br>RRID:AB_2245402 |
| Rabbit anti-rat IgG H&L, HRP (IHC: 1/1000)                  | Abcam                        | Cat#ab6734;<br>RRID:AB_955450      |
| Donkey anti-goat IgG H&L, HRP (IHC:1/1000)                  | Santa Cruz                   | Cat#SC-2033;<br>RRID:AB_631729     |
| <b>Chemicals, Peptides, and Recombinant Proteins</b>        |                              |                                    |
| Recombinant Human IL-4                                      | Peprotech                    | Cat#200-04                         |
| Recombinant Human IL-13                                     | Peprotech                    | Cat#AF-200-13                      |
| Recombinant Human IFN $\gamma$                              | Peprotech                    | Cat#300-02                         |
| Recombinant Murine M-CSF                                    | Peprotech                    | Cat#315-02                         |
| Recombinant Murine IL-4                                     | Peprotech                    | Cat#214-14                         |
| Recombinant Murine IL-13                                    | Peprotech                    | Cat#210-13                         |
| Recombinant Murine IFN $\gamma$                             | Peprotech                    | Cat#315-05                         |
| Recombinant human IL1RA                                     | R&D systems                  | Cat#280-RA-050                     |
| Human PPAR $\gamma$ protein                                 | Sino Biological              | Cat#12019-H20B                     |
| Human PPAR $\alpha$ protein                                 | Abnova                       | Cat#H00005465-P01                  |
| Human PPAR $\delta$ protein                                 | Abnova                       | Cat#H00005467-P01                  |
| Lipopolysaccharides (LPS)                                   | Sigma Aldrich                | Cat#L6529                          |
| Phorbol 12-myristate 13-acetate (PMA)                       | Sigma Aldrich                | Cat#P8139                          |
| DEHP                                                        | Sigma Aldrich                | Cat# 67261                         |
| MEHP                                                        | MedChemExpress               | Cat# HY-W018392                    |
| WY14643                                                     | R&D systems                  | Cat#1312                           |
| Rosiglitazone                                               | Cayman                       | Cat#71740                          |
| T0070907                                                    | R&D systems                  | Cat#2301                           |
| GW9662                                                      | Cayman                       | Cat#70785                          |
| GW6471                                                      | MedChemExpress               | Cat# HY-15372                      |
| <b>Critical Commercial Assays</b>                           |                              |                                    |
| Foxp3 / Transcription Factor Staining Buffer Set            | Invitrogen                   | Cat#00-5523-00                     |
| LEGENDplex Human Macrophage/Microglia Panel                 | Biolegend                    | Cat#740502                         |
| LEGENDplex Mouse Macrophage/Microglia Panel                 | Biolegend                    | Cat#740845                         |
| RNeasy Mini Kit                                             | QIAGEN                       | Cat#74104                          |
| Opal multiplex IHC research kit                             | Perkin Elmer                 | Cat# NEL810001KT                   |

|                                                                                     |                                                                                   |                                                                                               |
|-------------------------------------------------------------------------------------|-----------------------------------------------------------------------------------|-----------------------------------------------------------------------------------------------|
| DAB substrate kit                                                                   | Cell Signaling Technology                                                         | Cat#8095S                                                                                     |
| Deposited Data                                                                      |                                                                                   |                                                                                               |
| Raw and analyzed data                                                               | This paper; and Mendeley Data                                                     | <a href="http://dx.doi.org/10.17632/zd6pt6hb7y.1">http://dx.doi.org/10.17632/zd6pt6hb7y.1</a> |
| RNA-sequencing data                                                                 | This paper                                                                        | GEO: GSE159120                                                                                |
| RNA-sequencing data                                                                 | This paper                                                                        | GEO: GSE160004                                                                                |
| RNA-sequencing data                                                                 | This paper                                                                        | GEO: GSE160373;                                                                               |
| RNA-sequencing data                                                                 | This paper                                                                        | GEO: GSE160826                                                                                |
| Experimental Models: Cell Lines                                                     |                                                                                   |                                                                                               |
| THP-1                                                                               | American Type Culture Collection                                                  | Cat#TIB-202; RRID:CVCL_0006                                                                   |
| THP-1 with PPRE-eGFP                                                                | This paper                                                                        | N/A                                                                                           |
| HepG2                                                                               | Cell Bank of Type Culture Collection Committee of the Chinese Academy of Sciences | Cat#SCSP-510; N/A                                                                             |
| Experimental Models: Organisms/Strains                                              |                                                                                   |                                                                                               |
| Mouse: C57BL/6                                                                      | In house breeding                                                                 | N/A                                                                                           |
| Mouse: PPAR $\gamma$ <sup>loxP</sup> :B6.129- <i>Pparg</i> <sup>tm2Rev</sup> /J     | Jackson Laboratory                                                                | Cat# JAX:004584, RRID:IMSR_JAX:004584                                                         |
| Mouse: LysM <sup>Cre</sup> : B6.129P2- <i>Lyz2</i> <sup>tm1(cre)lf0</sup> /J        | Jackson Laboratory                                                                | Cat# JAX:004781, RRID:IMSR_JAX:004781                                                         |
| Mouse: Alb <sup>Cre</sup> : B6.Cg- <i>Speer6-ps1</i> <sup>Tg(Alb-cre)21Mgn</sup> /J | Jackson Laboratory                                                                | Cat# JAX:003574, RRID:IMSR_JAX:003574                                                         |
| Recombinant DNA                                                                     |                                                                                   |                                                                                               |
| Plasmid: PPRE-H2B-eGFP                                                              | Addgene                                                                           | Cat#84393; RRID:Addgene_84393                                                                 |
| Software and Algorithms                                                             |                                                                                   |                                                                                               |
| GraphPad prism (v 6.01)                                                             | GraphPad Software                                                                 | <a href="https://www.graphpad.com/">https://www.graphpad.com/</a>                             |
| ImageXpress(v6.0)                                                                   | Molecular Device                                                                  | <a href="https://www.moleculardevices.com">https://www.moleculardevices.com</a>               |
| Other                                                                               |                                                                                   |                                                                                               |
| Human TruStain FcX                                                                  | Biolegend                                                                         | Cat#422302                                                                                    |
| TruStain FcX (anti-mouse)                                                           | Biolegend                                                                         | Cat#101320                                                                                    |
| Fetal Bovine Serum (FBS)                                                            | Gibco                                                                             | Cat#10099141C                                                                                 |
| Fixation and Permeabilization Solution                                              | BD Bioscience                                                                     | Cat#554722                                                                                    |
| FluoroBrite™ DMEM                                                                   | Gibco                                                                             | Cat#A1896702                                                                                  |

|                                                             |               |               |
|-------------------------------------------------------------|---------------|---------------|
| Hoechst 33342                                               | Solarbio      | Cat#C0031     |
| Perm/Wash buffer                                            | BD Bioscience | Cat#554723    |
| RPMI 1640 (ATCC modification)                               | Gibco         | Cat#A1049101  |
| 2-mercaptoethanol                                           | Sigma Aldrich | Cat#M3148     |
| BODIPY 493/503                                              | Invitrogen    | Cat#D3922     |
| HCS LipidTOX™ Red Neutral Lipid Stain, for cellular imaging | Invitrogen    | Cat#34476     |
| TMRE                                                        | Abcam         | Cat# ab113852 |
| MitoSOX™ Red Mitochondrial Superoxide Indicator             | Invitrogen    | Cat# M36008   |
| CellROX deep red                                            | Invitrogen    | Cat#C10491    |



**Table S2** Liver weight and liver index in DEHP treated mice [mean  $\pm$  SD; n=10/group].

| <b>Dose group</b> | <b>0 mg/kg BW</b> | <b>625 mg/kg BW</b> | <b>1250 mg/kg BW</b> | <b>2500 mg/kg BW</b> |
|-------------------|-------------------|---------------------|----------------------|----------------------|
| Liver weight(g)   | 1.08 $\pm$ 0.13   | 1.29 $\pm$ 0.05***  | 1.28 $\pm$ 0.11***   | 1.49 $\pm$ 0.08***   |
| Liver index(%BW)  | 4.68 $\pm$ 0.37   | 5.38 $\pm$ 0.30***  | 5.35 $\pm$ 0.39***   | 6.50 $\pm$ 0.29***   |

Note: Correspond to Figure 1A. BW, body weight; DEHP, di(2-Ethylhexyl) phthalate; SD, standard deviation. \* $p$ <0.05, \*\* $p$ <0.01, \*\*\* $p$ <0.001, relative to vehicle control [analysis of variance (one-way ANOVA) with post hoc multiple comparison correction using Dunnett's multiple comparisons test].

**Table S3** Concentration of MEHP in plasma and liver of DEHP treated mice [mean  $\pm$  SD (n)].

| <b>Dose group</b>  | <b>0 mg/kg BW</b> | <b>625 mg/kg BW</b> | <b>1250 mg/kg BW</b> | <b>2500 mg/kg BW</b>   |
|--------------------|-------------------|---------------------|----------------------|------------------------|
| For Figure 1B:     | 0.40 $\pm$ 0.44   | 16.36 $\pm$ 5.71*   | 25.34 $\pm$ 4.54**   | 53.26 $\pm$ 18.61***   |
| Plasma(ng/ml)      | (6)               | (6)                 | (6)                  | (6)                    |
| For Figure 1C:     | 24.45 $\pm$ 12.69 | 273.64 $\pm$ 32.97* | 335.77 $\pm$ 80.03*  | 659.85 $\pm$ 277.48*** |
| Liver(ng/g tissue) | (5)               | (5)                 | (5)                  | (5)                    |

Note: Correspond to Figure 1B and 1C. BW, body weight; DEHP, di(2-Ethylhexyl) phthalate; SD, standard deviation; MEHP, mono-2-ethylhexyl phthalate. \* $p$ <0.05, \*\* $p$ <0.01, \*\*\* $p$ <0.001, relative to vehicle control [analysis of variance (one-way ANOVA) with post hoc multiple comparison correction using Dunnett's multiple comparisons test].

**Table S4** Clinical chemistry panel of DEHP treated mice [mean  $\pm$  SD; n=5/group]

| <b>Dose group</b> | <b>0 mg/kg BW</b> | <b>625 mg/kg BW</b> | <b>1250 mg/kg BW</b> | <b>2500 mg/kg BW</b> |
|-------------------|-------------------|---------------------|----------------------|----------------------|
| TG(mM)            | 0.74 $\pm$ 0.11   | 0.58 $\pm$ 0.07**   | 0.53 $\pm$ 0.04***   | 0.55 $\pm$ 0.03**    |
| CHO(mM)           | 1.55 $\pm$ 0.14   | 1.66 $\pm$ 0.08     | 1.86 $\pm$ 0.07**    | 2.12 $\pm$ 0.18***   |
| LDLC(mM)          | 0.25 $\pm$ 0.04   | 0.26 $\pm$ 0.02     | 0.27 $\pm$ 0.04      | 0.32 $\pm$ 0.03**    |
| HDLC(mM)          | 1.04 $\pm$ 0.13   | 1.15 $\pm$ 0.05     | 1.19 $\pm$ 0.10      | 1.37 $\pm$ 0.10***   |
| ALP(U/L)          | 73.96 $\pm$ 3.05  | 79.60 $\pm$ 7.16    | 90.00 $\pm$ 7.04**   | 106.40 $\pm$ 5.27*** |

Note: Correspond to Figure 1D. ALP, alkaline phosphatase; BW, body weight; CHO, cholesterol; DEHP, di(2-Ethylhexyl) phthalate; HDLC, high-density lipoprotein cholesterol; LDLC, low-density lipoprotein cholesterol; SD, standard deviation; TG, triglycerides; U/L, units per liter. \* $p$ <0.05, \*\* $p$ <0.01, \*\*\* $p$ <0.001, relative to vehicle control [analysis of variance (one-way ANOVA) with post hoc multiple comparison correction using Dunnett's multiple comparisons test].

**Table S5** Concentration of hepatic TG in DEHP treated mice [mean  $\pm$  SD; n=5/group].

| <b>Dose group</b>         | <b>0 mg/kg BW</b> | <b>625 mg/kg BW</b> | <b>1250 mg/kg BW</b> | <b>2500 mg/kg BW</b> |
|---------------------------|-------------------|---------------------|----------------------|----------------------|
| Liver( $\mu$ g/mg tissue) | 1.02 $\pm$ 0.25   | 2.48 $\pm$ 0.57**   | 4.59 $\pm$ 1.04***   | 6.25 $\pm$ 0.55***   |

Note: Correspond to Figure 1E. BW, body weight; DEHP, di(2-Ethylhexyl) phthalate; SD, standard deviation; TG, triglycerides. \* $p$ <0.05, \*\* $p$ <0.01, \*\*\* $p$ <0.001, relative to vehicle control [analysis of variance (one-way ANOVA) with post hoc multiple comparison correction using Dunnett's multiple comparisons test].

**Table S6** Hepatic pathological severity and oil red staining evaluation in DEHP treated mice [evaluating scores; mean  $\pm$  SD; n=6/group].

| <b>Dose group</b>             | <b>0 mg/kg BW</b> | <b>625 mg/kg BW</b> | <b>1250 mg/kg BW</b> | <b>2500 mg/kg BW</b> |
|-------------------------------|-------------------|---------------------|----------------------|----------------------|
| Hepatic pathological severity | 1.33 $\pm$ 0.52   | 6.00 $\pm$ 2.45**   | 11.17 $\pm$ 3.37***  | 14.17 $\pm$ 2.99***  |
| Oil red staining intensity    | 1.17 $\pm$ 0.41   | 3.33 $\pm$ 1.51     | 10.00 $\pm$ 3.52***  | 12.17 $\pm$ 3.37***  |

Note: Correspond to Figure 1F. BW, body weight; DEHP, di(2-Ethylhexyl) phthalate; SD, standard deviation. \* $p$ <0.05, \*\* $p$ <0.01, \*\*\* $p$ <0.001, relative to vehicle control [analysis of variance (one-way ANOVA) with post hoc multiple comparison correction using Dunnett's multiple comparisons test].

**Table S7** Fatty acid uptake and lipid accumulation evaluation in MEHP treated HepG2 cells [Mean stain area ( $\mu\text{m}^2$ ) (% of control); mean  $\pm$  SD; n=4/treatment].

| Dose(log10, $\mu\text{M}$ ) | BODIPY FL C12 uptake  | LD lipid accumulation |
|-----------------------------|-----------------------|-----------------------|
| 2.30                        | 386.06 $\pm$ 20.77*** | /                     |
| 2.00                        | 385.18 $\pm$ 68.99*** | /                     |
| 1.41                        | 309.85 $\pm$ 72.84*** | /                     |
| 1.13                        | 265.58 $\pm$ 67.09*** | /                     |
| 0.86                        | 202.41 $\pm$ 21.33*   | /                     |
| 0.62                        | 166.26 $\pm$ 29.19    | /                     |
| 0.41                        | 151.71 $\pm$ 15.03    | /                     |
| 0.00(control)               | 100.00 $\pm$ 0.00     | /                     |
| 2.30                        | /                     | 145.91 $\pm$ 12.61*** |
| 2.00                        | /                     | 155.81 $\pm$ 5.08***  |
| 1.71                        | /                     | 135.88 $\pm$ 2.01***  |
| 1.41                        | /                     | 134.99 $\pm$ 10.78*** |
| 1.13                        | /                     | 118.89 $\pm$ 9.69*    |
| 0.62                        | /                     | 104.89 $\pm$ 5.42     |
| 0.41                        | /                     | 103.87 $\pm$ 9.74     |
| 0.00(control)               | /                     | 100.00 $\pm$ 0.00     |

Note: Correspond to Figure 1G. BODIPY FL C16, fluorescence probe for C16 fatty acids; LD, lipid droplet; MEHP, mono-2-ethylhexyl phthalate; SD, standard deviation. \* $p$ <0.05, \*\* $p$ <0.01, \*\*\* $p$ <0.001, relative to vehicle control [analysis of variance (one-way ANOVA) with post hoc multiple comparison correction using Dunnett's multiple comparisons test].

**Table S8** Data for Figure 2A: Binding affinity analysis of PPAR $\alpha$  [Resonance units (RU); n=2006-2146; provided as [Excel Table S8](#)].

**Table S9** Data for Figure 2A: Binding affinity analysis of PPAR $\gamma$  [Resonance units (RU); n=1583-2131; provided as [Excel Table S9](#)].

**Table S10** PPRE and CD36 response in PPRE-THP-1 cells derived macrophages [positive cells (%); mean±SD; n=6 sites/treatment].

| <b>Treatment</b> | <b>CT(DMSO)</b> | <b>WY</b>   | <b>RGZ</b>    | <b>T0070907</b> | <b>DEHP</b> | <b>MEHP</b>  |
|------------------|-----------------|-------------|---------------|-----------------|-------------|--------------|
| PPRE             | 22.84±4.63      | 29.54±4.64* | 37.01±4.59*** | 24.21±2.22      | 28.83±1.67* | 29.45±3.28*  |
| CD36             | 35.11±4.02      | 47.14±6.56* | 62.91±3.34*** | 29.48±3.07*     | 46.92±3.87* | 52.04±6.81** |

Note: Correspond to Figure 2C. CT, vehicle control; DMSO, dimethyl sulfoxide; DEHP, di(2-Ethylhexyl) phthalate; MEHP, mono-2-ethylhexyl phthalate; WY, WY14643, PPAR $\alpha$  agonist; RGZ, rosiglitazone, PPAR $\gamma$  agonist; T0070907, PPAR $\gamma$  antagonist; SD, standard deviation. \* $p$ <0.05, \*\* $p$ <0.01, \*\*\* $p$ <0.001, relative to vehicle control [analysis of variance (one-way ANOVA) with post hoc multiple comparison correction using Dunnett's multiple comparisons test].

**Table S11** Dose response curves of PPRE in PPRE-THP-1 cells derived macrophages [mean stain area ( $\mu\text{m}^2$ ); mean; n=3/treatment].

| Concentration(log10, $\mu\text{M}$ ) | WY     | RGZ    | GW6471 | GW9662 | T0070907 |
|--------------------------------------|--------|--------|--------|--------|----------|
| 2.30                                 | 126.34 | 162.38 | /      | /      | /        |
| 2.00                                 | 135.06 | 162.51 | /      | /      | /        |
| 1.70                                 | 112.00 | 162.51 | /      | /      | /        |
| 1.40                                 | 88.56  | 155.70 | /      | /      | /        |
| 1.10                                 | 73.14  | 145.73 | /      | /      | /        |
| 0.80                                 | 75.43  | 143.78 | /      | /      | /        |
| 0.49                                 | 82.50  | 131.59 | /      | /      | /        |
| 0.19                                 | 68.15  | 120.50 | /      | /      | /        |
| -6.00                                | 73.26  | 73.26  | /      | /      | /        |
| 1.30                                 | /      | /      | 58.37  | 83.08  | 44.42    |
| 1.00                                 | /      | /      | 67.38  | 86.19  | 48.07    |
| 0.70                                 | /      | /      | 66.57  | 82.34  | 44.93    |
| 0.40                                 | /      | /      | 74.31  | 93.06  | 43.01    |
| 0.10                                 | /      | /      | 74.07  | 94.15  | 48.01    |
| -0.20                                | /      | /      | 73.38  | 82.57  | 54.98    |
| -0.51                                | /      | /      | 62.74  | 75.32  | 58.90    |
| -0.81                                | /      | /      | 73.26  | 73.26  | 73.26    |

Note: Correspond to Figure 2D. WY, WY14643, PPAR $\alpha$  agonist; GW6471, PPAR $\alpha$  antagonist; GW9662, PPAR $\gamma$  antagonist; RGZ, rosiglitazone, PPAR $\gamma$  agonist; T0070907, PPAR $\gamma$  antagonist and inverse agonist.



**Table S12** Dose response curve of CD36 in PPRE-THP-1 cells derived macrophages [mean stain area ( $\mu\text{m}^2$ ); mean, n=3/treatment)].

| Concentration(log10, $\mu\text{M}$ ) | WY     | RGZ    | GW6471 | GW9662 | T0070907 |
|--------------------------------------|--------|--------|--------|--------|----------|
| 2.30                                 | 248.23 | 274.00 | /      | /      | /        |
| 2.00                                 | 247.48 | 274.90 | /      | /      | /        |
| 1.70                                 | 204.21 | 272.40 | /      | /      | /        |
| 1.40                                 | 155.63 | 267.38 | /      | /      | /        |
| 1.10                                 | 127.37 | 250.40 | /      | /      | /        |
| 0.80                                 | 131.57 | 239.42 | /      | /      | /        |
| 0.49                                 | 136.57 | 220.35 | /      | /      | /        |
| 0.19                                 | 116.47 | 239.65 | /      | /      | /        |
| -1.20                                | 118.64 | 118.64 | 118.64 | 118.64 | 118.64   |
| 1.30                                 | /      | /      | 91.82  | 142.00 | 32.87    |
| 1.00                                 | /      | /      | 104.29 | 142.11 | 38.05    |
| 0.70                                 | /      | /      | 106.56 | 144.74 | 49.87    |
| 0.40                                 | /      | /      | 111.02 | 146.70 | 44.93    |
| 0.10                                 | /      | /      | 120.55 | 156.97 | 44.53    |
| -0.20                                | /      | /      | 129.32 | 159.01 | 53.98    |
| -0.51                                | /      | /      | 123.97 | 140.34 | 61.82    |
| -0.81                                | /      | /      | 114.27 | 130.74 | 56.55    |

Note: Correspond to Figure 2D. WY, WY14643, PPAR $\alpha$  agonist; GW6471, PPAR $\alpha$  antagonist; GW9662, PPAR $\gamma$  antagonist; RGZ, rosiglitazone, PPAR $\gamma$  agonist; T0070907, PPAR $\gamma$  antagonist and inverse agonist.

**Table S13** Dose response curve of PPRE and CD36 in MEHP treated macrophages with/without PPAR $\alpha/\gamma$  antagonists [mean stain area ( $\mu\text{m}^2$ ); mean, n=3/treatment].

| Concentration<br>(log10, $\mu\text{M}$ ) | MEHP   |        | M+GW6471 |        | M+GW9662 |        | M+T0070907 |        |
|------------------------------------------|--------|--------|----------|--------|----------|--------|------------|--------|
|                                          | PPRE   | CD36   | PPRE     | CD36   | PPRE     | CD36   | PPRE       | CD36   |
| 2.30                                     | 135.76 | 274.05 | 83.60    | 198.29 | 101.69   | 208.05 | 72.75      | 156.07 |
| 2.00                                     | 131.30 | 251.43 | 65.56    | 153.60 | 113.41   | 200.50 | 87.55      | 155.45 |
| 1.70                                     | 117.13 | 206.65 | 61.20    | 122.91 | 113.01   | 208.83 | 79.08      | 125.57 |
| 1.40                                     | 101.23 | 182.55 | 51.40    | 98.85  | 91.39    | 172.65 | 69.94      | 94.16  |
| 1.10                                     | 91.51  | 152.13 | 58.30    | 105.67 | 92.26    | 173.16 | 45.27      | 58.25  |
| 0.80                                     | 85.18  | 143.89 | 49.34    | 103.64 | 93.83    | 151.63 | 51.89      | 56.31  |
| 0.49                                     | 80.87  | 153.89 | 53.96    | 103.54 | 82.93    | 145.05 | 46.54      | 44.71  |
| 0.19                                     | 72.38  | 120.15 | 50.40    | 96.44  | 77.36    | 138.10 | 38.66      | 41.72  |
| 2.30                                     | 135.76 | 274.05 | 83.60    | 198.29 | 101.69   | 208.05 | 72.75      | 156.07 |
| 2.00                                     | 131.30 | 251.43 | 65.56    | 153.60 | 113.41   | 200.50 | 87.55      | 155.45 |
| 1.70                                     | 117.13 | 206.65 | 61.20    | 122.91 | 113.01   | 208.83 | 79.08      | 125.57 |
| 1.40                                     | 101.23 | 182.55 | 51.40    | 98.85  | 91.39    | 172.65 | 69.94      | 94.16  |
| 1.10                                     | 91.51  | 152.13 | 58.30    | 105.67 | 92.26    | 173.16 | 45.27      | 58.25  |
| 0.80                                     | 85.18  | 143.89 | 49.34    | 103.64 | 93.83    | 151.63 | 51.89      | 56.31  |
| 0.49                                     | 80.87  | 153.89 | 53.96    | 103.54 | 82.93    | 145.05 | 46.54      | 44.71  |
| 0.19                                     | 72.38  | 120.15 | 50.40    | 96.44  | 77.36    | 138.10 | 38.66      | 41.72  |

Note: Correspond to Figure 2E. GW6471, PPAR $\alpha$  antagonist; GW9662, PPAR $\gamma$  antagonist; M, MEHP, mono-2-ethylhexyl phthalate; T0070907, PPAR $\gamma$  antagonist and inverse agonist.

**Table S14** Liver weight and liver index in WT and Hep-KO mice [mean  $\pm$  SD (n)]

|                  | <b>Treatment</b> | <b>CMC</b>          | <b>DEHP</b>            |
|------------------|------------------|---------------------|------------------------|
| Liver weight(g)  | WT               | 1.24 $\pm$ 0.13 (7) | 1.65 $\pm$ 0.15 (7)**  |
|                  | Hep-KO           | 1.16 $\pm$ 0.17 (5) | 1.60 $\pm$ 0.08 (5)**  |
| Liver index(%BW) | WT               | 4.69 $\pm$ 0.48 (7) | 6.34 $\pm$ 0.37 (7)*** |
|                  | Hep-KO           | 4.45 $\pm$ 0.52 (5) | 6.23 $\pm$ 0.14 (5)*** |

Note: Correspond to Figure 3A. BW, body weight; CMC, sodium carboxymethylcellulose, vehicle control; DEHP, di(2-Ethylhexyl) phthalate; Hep-KO, hepatocyte-specific PPAR $\gamma$  knockout; SD, standard deviation; WT, wild type. \* $p$ <0.05, \*\* $p$ <0.01, \*\*\*  $p$ <0.001, relative to vehicle control [analysis of variance (two-way ANOVA) with post hoc multiple comparison correction using Bonferroni's multiple comparisons test].

**Table S15** Clinical chemistry panel in WT and Hep-KO mice [mean  $\pm$  SD (n)].

| Measurements | Treatment | CMC                  | DEHP                    |
|--------------|-----------|----------------------|-------------------------|
| TG(mM)       | WT        | 0.64 $\pm$ 0.06 (7)  | 0.49 $\pm$ 0.07 (7)***  |
|              | Hep-KO    | 0.64 $\pm$ 0.05 (5)  | 0.49 $\pm$ 0.05 (5)**   |
| CHO(mM)      | WT        | 1.62 $\pm$ 0.41 (7)  | 2.30 $\pm$ 0.26 (7)***  |
|              | Hep-KO    | 1.71 $\pm$ 0.35 (5)  | 2.36 $\pm$ 0.06 (5)**   |
| CHE(mM)      | WT        | 2.63 $\pm$ 0.21 (7)  | 3.95 $\pm$ 0.50 (7)***  |
|              | Hep-KO    | 2.74 $\pm$ 0.16 (4)  | 3.89 $\pm$ 0.31 (5)***  |
| ALP(U/L)     | WT        | 72.67 $\pm$ 5.05 (6) | 93.00 $\pm$ 11.25 (7)** |
|              | Hep-KO    | 70.20 $\pm$ 8.07 (5) | 96.40 $\pm$ 14.84 (5)** |
| HDL(mM)      | WT        | 1.22 $\pm$ 0.13 (7)  | 1.57 $\pm$ 0.12 (6)***  |
|              | Hep-KO    | 1.19 $\pm$ 0.21 (5)  | 1.58 $\pm$ 0.05 (5)***  |
| LDL(mM)      | WT        | 0.25 $\pm$ 0.03 (5)  | 0.35 $\pm$ 0.04 (6)**   |
|              | Hep-KO    | 0.27 $\pm$ 0.06 (5)  | 0.42 $\pm$ 0.04 (5)***  |

Note: Correspond to Figure 3B. ALP, alkaline phosphatase; BW, body weight; CHE, cholinesterase; CHO, cholesterol; CMC, sodium carboxymethylcellulose, vehicle control; DEHP, di(2-Ethylhexyl) phthalate; HDL, high-density lipoprotein cholesterol; Hep-KO, hepatocyte-specific PPAR $\gamma$  knockout; LDL, low-density lipoprotein cholesterol; SD, standard deviation; TG, triglycerides; U/L, units per liter; WT, wild type. \* $p$ <0.05, \*\* $p$ <0.01, \*\*\* $p$ <0.001, relative to vehicle control [analysis of variance (two-way ANOVA) with post hoc multiple comparison correction using Bonferroni's multiple comparisons test].

**Table S16** Concentration of hepatic TG in WT and Hep-KO mice [ $\mu\text{g}/\text{mg}$  tissue; mean  $\pm$  SD (n)].

| <b>Treatment</b> | <b>CMC</b>          | <b>DEHP</b>            |
|------------------|---------------------|------------------------|
| WT               | 1.05 $\pm$ 0.13 (7) | 2.64 $\pm$ 0.20 (7)*** |
| Hep-KO           | 0.88 $\pm$ 0.23 (5) | 2.71 $\pm$ 0.25 (5)*** |

Note: Correspond to Figure 3C. CMC, sodium carboxymethylcellulose, vehicle control; DEHP, di(2-Ethylhexyl) phthalate; Hep-KO, hepatocyte-specific PPAR $\gamma$  knockout; SD, standard deviation; TG, triglycerides; WT, wild type. \* $p$ <0.05, \*\* $p$ <0.01, \*\*\* $p$ <0.001, relative to vehicle control [analysis of variance (two-way ANOVA) with post hoc multiple comparison correction using Bonferroni's multiple comparisons test].

**Table S17** Hepatic pathological severity evaluation in WT and Hep-KO mice [evaluating scores; mean  $\pm$  SD (n)].

| <b>Treatment</b> | <b>CMC</b>          | <b>DEHP</b>             |
|------------------|---------------------|-------------------------|
| WT               | 1.29 $\pm$ 0.49 (7) | 11.29 $\pm$ 3.86 (7)*** |
| Hep-KO           | 1.20 $\pm$ 0.45 (5) | 10.60 $\pm$ 3.44 (5)*** |

Note: Correspond to Figure 3D. CMC, sodium carboxymethylcellulose, vehicle control; DEHP, di(2-Ethylhexyl) phthalate; Hep-KO, hepatocyte-specific PPAR $\gamma$  knockout; SD, standard deviation; WT, wild type. \* $p$ <0.05, \*\* $p$ <0.01, \*\*\* $p$ <0.001, relative to vehicle control [analysis of variance (two-way ANOVA) with post hoc multiple comparison correction using Bonferroni's multiple comparisons test].

**Table S18** Macrophages evaluation in liver sections from WT and Hep-KO mice [cell number per site; mean  $\pm$  SD (n)].

|                                | <b>Treatment</b> | <b>CMC</b>             | <b>DEHP</b>              |
|--------------------------------|------------------|------------------------|--------------------------|
| CLEC4F <sup>+</sup> KCs        | WT               | 102.43 $\pm$ 9.85 (7)  | 50.71 $\pm$ 10.05 (7)*** |
|                                | Hep-KO           | 98.60 $\pm$ 10.01 (5)  | 46.00 $\pm$ 18.73 (5)*** |
| F4/80 <sup>+</sup> macrophages | WT               | 286.14 $\pm$ 26.33 (7) | 306.43 $\pm$ 26.15 (7)   |
|                                | Hep-KO           | 290.60 $\pm$ 41.32 (5) | 293.20 $\pm$ 24.99 (5)   |

Note: Correspond to Figure 3F. CMC, sodium carboxymethylcellulose, vehicle control; DEHP, di(2-Ethylhexyl) phthalate; Hep-KO, hepatocyte-specific PPAR $\gamma$  knockout; KCs, kupffer cells; SD, standard deviation; WT, wild type. \* $p$ <0.05, \*\* $p$ <0.01, \*\*\* $p$ <0.001, relative to vehicle control [analysis of variance (two-way ANOVA) with post hoc multiple comparison correction using Bonferroni's multiple comparisons test].

**Table S19** Liver weight and liver index in WT and Mac-KO mice [mean  $\pm$  SD; n=5/group]

|                  | <b>Treatment</b> | <b>CMC</b>      | <b>DEHP</b>                  |
|------------------|------------------|-----------------|------------------------------|
| Liver weight(g)  | WT               | 1.36 $\pm$ 0.30 | 1.87 $\pm$ 0.20***           |
|                  | Mac-KO           | 1.50 $\pm$ 0.09 | 1.70 $\pm$ 0.10              |
| Liver index(%BW) | WT               | 4.60 $\pm$ 0.71 | 6.39 $\pm$ 0.16***           |
|                  | Mac-KO           | 4.94 $\pm$ 0.27 | 5.55 $\pm$ 0.20 <sup>a</sup> |

Note: Correspond to Figure 4A. BW, body weight; CMC, sodium carboxymethylcellulose, vehicle control; DEHP, di(2-Ethylhexyl) phthalate; Mac-KO, macrophage-specific PPAR $\gamma$  knockout; SD, standard deviation; WT, wild type. \* $p$ <0.05, \*\* $p$ <0.01, \*\*\* $p$ <0.001, relative to vehicle control; <sup>a</sup> $p$ <0.05, <sup>b</sup> $p$ <0.01, <sup>c</sup> $p$ <0.001, relative to WT DEHP [analysis of variance (two-way ANOVA) with post hoc multiple comparison correction using Tukey's multiple comparisons test].



**Table S20** Concentration of hepatic TG in WT and Mac-KO mice [ $\mu\text{g}/\text{mg}$  tissue; mean  $\pm$  SD; n=5/group].

| <b>Treatment</b> | <b>CMC</b>      | <b>DEHP</b>                    |
|------------------|-----------------|--------------------------------|
| WT               | 0.99 $\pm$ 0.18 | 3.09 $\pm$ 0.36***             |
| Mac-KO           | 0.94 $\pm$ 0.34 | 1.55 $\pm$ 0.36*. <sup>c</sup> |

Note: Correspond to Figure 4B. CMC, sodium carboxymethylcellulose, vehicle control; DEHP, di(2-Ethylhexyl) phthalate; Mac-KO, macrophage-specific PPAR $\gamma$  knockout; SD, standard deviation; TG, triglycerides; WT, wild type. \* $p$ <0.05, \*\* $p$ <0.01, \*\*\* $p$ <0.001, relative to vehicle control; <sup>a</sup> $p$ <0.05, <sup>b</sup> $p$ <0.01, <sup>c</sup> $p$ <0.001, relative to WT DEHP [analysis of variance (two-way ANOVA) with post hoc multiple comparison correction using Tukey's multiple comparisons test].

**Table S21** Hepatic pathological severity and oil red staining evaluation in WT and Mac-KO mice [evaluating scores; mean  $\pm$  SD; n=5/group].

|                            | <b>Treatment</b> | <b>CMC</b>      | <b>DEHP</b>                    |
|----------------------------|------------------|-----------------|--------------------------------|
| Pathological severity      | WT               | 1.40 $\pm$ 0.55 | 12.20 $\pm$ 2.49***            |
|                            | Mac-KO           | 1.60 $\pm$ 0.55 | 6.60 $\pm$ 1.95** <sup>c</sup> |
| Oil red staining intensity | WT               | 1.20 $\pm$ 0.45 | 11.40 $\pm$ 3.13***            |
|                            | Mac-KO           | 1.60 $\pm$ 0.89 | 5.60 $\pm$ 1.67* <sup>c</sup>  |

Note: Correspond to Figure 4C. CMC, sodium carboxymethylcellulose, vehicle control; DEHP, di(2-Ethylhexyl) phthalate; Mac-KO, macrophage-specific PPAR $\gamma$  knockout; SD, standard deviation; WT, wild type. \* $p$ <0.05, \*\* $p$ <0.01, \*\*\* $p$ <0.001, relative to vehicle control; <sup>a</sup> $p$ <0.05, <sup>b</sup> $p$ <0.01, <sup>c</sup> $p$ <0.001, relative to WT DEHP [analysis of variance (two-way ANOVA) with post hoc multiple comparison correction using Tukey's multiple comparisons test].

**Table S22** M2 macrophages analysis in liver of WT and Mac-KO mice using flow cytometry [% of CD45<sup>+</sup> cells; mean  $\pm$  SD; n=5/group].

|                                       | <b>Treatment</b> | <b>CMC</b>       | <b>DEHP</b>                   |
|---------------------------------------|------------------|------------------|-------------------------------|
| F4/80 <sup>+</sup> CD206 <sup>+</sup> | WT               | 16.30 $\pm$ 3.26 | 14.08 $\pm$ 2.33**            |
| M2 Macrophages                        | Mac-KO           | 16.96 $\pm$ 2.01 | 22.60 $\pm$ 2.62 <sup>c</sup> |

Note: Correspond to Figure 4D. CMC, sodium carboxymethylcellulose, vehicle control; DEHP, di(2-Ethylhexyl) phthalate; Mac-KO, macrophage-specific PPAR $\gamma$  knockout; SD, standard deviation; WT, wild type. \* $p$ <0.05, \*\* $p$ <0.01, \*\*\* $p$ <0.001, relative to vehicle control; <sup>a</sup> $p$ <0.05, <sup>b</sup> $p$ <0.01, <sup>c</sup> $p$ <0.001, relative to WT DEHP [analysis of variance (two-way ANOVA) with post hoc multiple comparison correction using Tukey's multiple comparisons test].

**Table S23** Macrophages evaluation in liver sections from WT and Mac-KO mice [cell number per site; mean  $\pm$  SD; n=5/group].

|               | <b>Treatment</b> | <b>CMC</b>         | <b>DEHP</b>                     |
|---------------|------------------|--------------------|---------------------------------|
| CLEC4F+       | WT               | 101.60 $\pm$ 10.88 | 46.80 $\pm$ 13.16***            |
| Kupffer Cells | Mac-KO           | 101.60 $\pm$ 11.61 | 117.80 $\pm$ 13.74 <sup>c</sup> |

Note: Correspond to Figure 4E. CMC, sodium carboxymethylcellulose, vehicle control; DEHP, di(2-Ethylhexyl) phthalate; Mac-KO, macrophage-specific PPAR $\gamma$  knockout; SD, standard deviation; WT, wild type. \* $p$ <0.05, \*\* $p$ <0.01, \*\*\* $p$ <0.001, relative to vehicle control; <sup>a</sup> $p$ <0.05, <sup>b</sup> $p$ <0.01, <sup>c</sup> $p$ <0.001, relative to WT DEHP [analysis of variance (two-way ANOVA) with post hoc multiple comparison correction using Tukey's multiple comparisons test].

**Table S24** Monocyte evaluation in liver from WT and Mac-KO mice [% of CD45<sup>+</sup> cells; mean  $\pm$  SD; n=5/group]

|                                                           | <b>Treatment</b> | <b>CMC</b>       | <b>DEHP</b>                   |
|-----------------------------------------------------------|------------------|------------------|-------------------------------|
| CD11b <sup>+</sup> CCR2 <sup>+</sup> Ly6c <sup>high</sup> | WT               | 1.90 $\pm$ 0.67  | 3.88 $\pm$ 0.83***            |
| Inflammatory monocyte                                     | Mac-KO           | 1.15 $\pm$ 0.30  | 2.26 $\pm$ 0.53 <sup>b</sup>  |
| CD11b <sup>+</sup> CCR2 <sup>+</sup> Ly6c <sup>low</sup>  | WT               | 11.45 $\pm$ 2.41 | 12.27 $\pm$ 1.84              |
| Patrolling monocyte                                       | Mac-KO           | 12.81 $\pm$ 1.22 | 17.47 $\pm$ 2.92 <sup>b</sup> |

Note: Correspond to Figure 4F. CMC, sodium carboxymethylcellulose, vehicle control; DEHP, di(2-Ethylhexyl) phthalate; Mac-KO, macrophage-specific PPAR $\gamma$  knockout; SD, standard deviation; WT, wild type. \* $p$ <0.05, \*\* $p$ <0.01, \*\*\* $p$ <0.001, relative to vehicle control; <sup>a</sup> $p$ <0.05, <sup>b</sup> $p$ <0.01, <sup>c</sup> $p$ <0.001, relative to WT DEHP [analysis of variance (two-way ANOVA) with post hoc multiple comparison correction using Tukey's multiple comparisons test].

**Table S25** M2 macrophages polarization evaluation in BMDM from WT and Mac-KO mice [CD206<sup>+</sup> cells (%); mean  $\pm$  SD; n=15 technical replicates/treatment].

| Treatment | CT(DMSO)         | DEHP                          | MEHP                          |
|-----------|------------------|-------------------------------|-------------------------------|
| WT        | 90.13 $\pm$ 2.00 | 68.14 $\pm$ 4.50***           | 73.78 $\pm$ 4.59***           |
| Mac-KO    | 92.55 $\pm$ 2.43 | 76.18 $\pm$ 3.88 <sup>c</sup> | 84.04 $\pm$ 4.46 <sup>c</sup> |

Note: Correspond to Figure 5A. BMDM, bone marrow derived macrophages; CT, vehicle control; DEHP, di(2-Ethylhexyl) phthalate; DMSO, dimethyl sulfoxide; MEHP, mono-2-ethylhexyl phthalate; Mac-KO, macrophage-specific PPAR $\gamma$  knockout; SD, standard deviation; WT, wild type. \* $p$ <0.05, \*\* $p$ <0.01, \*\*\* $p$ <0.001, relative to vehicle control. <sup>a</sup> $p$ <0.05, <sup>b</sup> $p$ <0.01, <sup>c</sup> $p$ <0.001, relative to WT DEHP or WT MEHP [analysis of variance (two-way ANOVA) with post hoc multiple comparison correction using Tukey's multiple comparisons test].

**Table S26** Relative expression of DEGs associated with M2 macrophages in MEHP treated macrophages [Z scores; n=3/treatment; provided as [Excel Table S26](#)].

**Table S27** Relative expression of DEGs associated with PPAR pathway in MEHP treated macrophages [Z scores; n=3/treatment; provided as [Excel Table S27](#)].

**Table S28** Characteristics of PPRE-THP-1 cells derived M2 macrophages [Mean stain area ( $\mu\text{m}^2$ ); mean  $\pm$  SD; n=2/subtype].

| <b>Treatment</b> | <b>CD209</b>        | <b>PPRE</b>        | <b>CD36</b>         | <b>LD</b>           |
|------------------|---------------------|--------------------|---------------------|---------------------|
| M0               | 21.90 $\pm$ 0.14    | 37.09 $\pm$ 5.29   | 115.42 $\pm$ 25.90  | 116.87 $\pm$ 24.68  |
| M1               | 64.16 $\pm$ 2.28*   | 53.16 $\pm$ 8.15   | 104.42 $\pm$ 15.16  | 129.52 $\pm$ 32.37  |
| M2               | 346.11 $\pm$ 5.79** | 88.42 $\pm$ 6.98** | 204.92 $\pm$ 0.64** | 215.70 $\pm$ 4.13** |

Note: Correspond to Figure 5E. LD, lipid droplet; PPRE, peroxisome proliferator-activated receptor response elements; SD, standard deviation. \* $p < 0.05$ , \*\* $p < 0.01$ , \*\*\* $p < 0.001$ , relative to vehicle control [analysis of variance (one-way ANOVA) with post hoc multiple comparison correction using Bonferroni's multiple comparisons test].

**Table S29** Dose response curves of PPRE/CD209/LD in DEHP/MEHP treated M2 macrophages [% of control; mean, n=3/treatment].

| Concentration<br>(log <sub>10</sub> , μM) | DEHP   |        |        | MEHP   |        |        |
|-------------------------------------------|--------|--------|--------|--------|--------|--------|
|                                           | CD209  | PPRE   | LD     | CD209  | PPRE   | LD     |
| 2.30                                      | 49.23  | 73.13  | 32.05  | 39.04  | 84.41  | 43.07  |
| 2.00                                      | 67.16  | /      | 39.74  | 52.23  | 81.93  | 61.16  |
| 1.70                                      | /      | 82.40  | 26.68  | 65.51  | 82.90  | 46.08  |
| 1.40                                      | 56.72  | /      | /      | 73.63  | 77.84  | 57.08  |
| 1.10                                      | 71.68  | 79.55  | 42.93  | 66.98  | /      | 63.00  |
| 0.80                                      | 64.71  | 86.07  | 50.59  | 82.05  | /      | 78.72  |
| 0.49                                      | 85.89  | 85.18  | /      | 94.20  | 86.56  | 89.05  |
| 0.19                                      | 78.34  | 92.57  | 71.80  | /      | 86.99  | /      |
| 0.00                                      | 100.00 | 100.00 | 100.00 | 100.00 | 100.00 | 100.00 |

Note: Correspond to Figure 5F. DEHP, di(2-Ethylhexyl) phthalate; LD, lipid droplet; MEHP, mono-2-ethylhexyl phthalate; PPRE, peroxisome proliferator-activated receptor response elements.



**Table S30** Data for Figure 5G: Dose response curves of CD209 in PPAR $\alpha$ / $\gamma$  agonists treated M2 macrophages [Mean stain area ( $\mu\text{m}^2$ ); mean; n=3/treatment].

| <b>Concentration<br/>(log10, <math>\mu\text{M}</math>)</b> | <b>WY</b> | <b>RGZ</b> | <b>MEHP</b> | <b>GW7647</b> |
|------------------------------------------------------------|-----------|------------|-------------|---------------|
| 1.40                                                       | 116.19    | 26.99      | 37.79       | /             |
| 1.10                                                       | 100.02    | 50.91      | 49.02       | /             |
| 0.80                                                       | 119.79    | 60.79      | 56.73       | /             |
| 0.49                                                       | 95.07     | 61.34      | 73.97       | /             |
| 0.19                                                       | 93.99     | 58.64      | 76.44       | /             |
| -0.11                                                      | 69.17     | 61.09      | 76.12       | /             |
| -0.41                                                      | 71.35     | 71.35      | 71.35       | /             |
| 1.30                                                       | /         | /          | /           | 202.88        |
| 1.00                                                       | /         | /          | /           | 195.04        |
| 0.70                                                       | /         | /          | /           | 193.10        |
| 0.40                                                       | /         | /          | /           | 180.27        |
| 0.10                                                       | /         | /          | /           | 122.67        |
| -0.20                                                      | /         | /          | /           | /             |
| -0.51                                                      | /         | /          | /           | 95.27         |
| -0.81                                                      | /         | /          | /           | 71.35         |

Note: Correspond to Figure 5G. GW7647, PPAR $\alpha$  agonist; MEHP, mono-2-ethylhexyl phthalate; RGZ, rosiglitazone, PPAR $\gamma$  agonist; WY, WY14643, PPAR $\alpha$  agonist.

**Table S31** Data for Figure 5H: Dose response curves of CD209 in PPAR $\alpha$ / $\gamma$  antagonists treated M2 macrophages [Mean stain area ( $\mu\text{m}^2$ ); mean, n=3/treatment]

| <b>Concentration<br/>(log10, <math>\mu\text{M}</math>)</b> | <b>GW6471</b> | <b>GW9662</b> | <b>T0070907</b> |
|------------------------------------------------------------|---------------|---------------|-----------------|
| 0.10                                                       | 62.84         | 83.37         | 93.42           |
| -0.20                                                      | 68.33         | 82.01         | 91.64           |
| -0.51                                                      | 76.97         | 82.45         | 90.49           |
| -0.81                                                      | 77.89         | 80.13         | 83.53           |
| -1.11                                                      | 75.14         | 69.83         | 78.47           |

Note: Correspond to Figure 5H. GW6471, PPAR $\alpha$  antagonist; GW9662, PPAR $\gamma$  antagonist; T0070907, PPAR $\gamma$  antagonist and inverse agonist.

**Table S32** Response of CD209/CD36/LD in MEHP treated M2 macrophages with/without PPAR $\alpha/\gamma$  antagonists [Mean stain area ( $\mu\text{m}^2$ ); mean  $\pm$  SD (n)].

| Treatment | CT(DMSO)               | MEHP                    | M+GW6471                               | M+GW9662                            |
|-----------|------------------------|-------------------------|----------------------------------------|-------------------------------------|
| CD209     | 153.98 $\pm$ 29.47 (4) | 98.39 $\pm$ 26.21 (3)*  | 45.29 $\pm$ 4.79 (3)***, <sup>3</sup>  | 111.46 $\pm$ 14.36 (3)              |
| CD36      | 52.09 $\pm$ 2.50 (4)   | 35.10 $\pm$ 3.04 (5)**  | 18.19 $\pm$ 4.29 (5)***, <sup>2</sup>  | 41.96 $\pm$ 9.78 (5)                |
| LD        | 347.32 $\pm$ 13.57 (4) | 296.67 $\pm$ 39.66 (4)* | 233.82 $\pm$ 15.60 (4)**, <sup>1</sup> | 374.59 $\pm$ 13.60 (4) <sup>2</sup> |

Note: Correspond to Figure 5I. CT, vehicle control; DMSO, dimethyl sulfoxide; GW6471, PPAR $\alpha$  antagonist; GW9662, PPAR $\gamma$  antagonist; MEHP, mono-2-ethylhexyl phthalate; SD, standard deviation. \* $p$ <0.05, \*\* $p$ <0.01, \*\*\* $p$ <0.001, relative to vehicle control; <sup>1</sup> $p$ <0.05, <sup>2</sup> $p$ <0.01, <sup>3</sup> $p$ <0.001, relative to MEHP treatment [analysis of variance (one-way ANOVA) with post hoc multiple comparison correction using Bonferroni's multiple comparisons test].

**Table S33** Data for Figure 6A: Transcriptomic profiling of livers from different mice models [DEGs; provided as [Excel Table S33](#)].

**Table S34** Data for Figure 6B: Relative expression of DEGs associated with lipid metabolism in liver from different mice models [Z scores; n=4-6/group; provided as [Excel Table S34](#)].

**Table S35** Pathway enrichment analysis of DEGs in liver from different mice models [enrichment scores].

| <b>Pathways</b>                            | <b>WT</b> | <b>Hep-KO</b> | <b>Mac-KO</b> |
|--------------------------------------------|-----------|---------------|---------------|
| PPAR signaling pathway                     | 11.52     | 11.30         | 9.46          |
| Fatty acid degradation                     | 10.75     | 10.90         | 9.17          |
| Retinol metabolism                         | 7.59      | 7.05          | 8.18          |
| Biosynthesis of unsaturated fatty acids    | 6.65      | 2.74          | 5.87          |
| Chemical carcinogenesis                    | 6.45      | 3.75          | 3.05          |
| Oxidative phosphorylation                  | 5.24      | 4.98          | 0.00          |
| Fatty acid metabolism                      | 4.68      | 1.96          | 3.87          |
| Valine, leucine and isoleucine degradation | 4.46      | 2.82          | 3.74          |
| Steroid hormone biosynthesis               | 3.99      | 0.00          | 4.17          |
| Arachidonic acid metabolism                | 3.92      | 4.84          | 6.48          |

Note: Correspond to Figure 6C. DEGs, differentially expressed genes; Hep-KO, hepatocyte-specific PPAR $\gamma$  knockout; Mac-KO, macrophage-specific PPAR $\gamma$  knockout; WT, wild type.

**Table S36** Data for Figure 6D: GO analysis of DEGs in livers from different mice models [provided as [Excel Table S36](#)].

**Table S37** Superclass constitution of lipid metabolites in liver from different mice models [lipid counts; average ratio (DEHP/CT ratio)].

| Mice model               | WT   |      | Hep-KO |      | Mac-KO |      |
|--------------------------|------|------|--------|------|--------|------|
|                          | LC   | AR   | LC     | AR   | LC     | AR   |
| NEG                      |      |      |        |      |        |      |
| Glycerophospholipids[GP] | 6635 | 1.89 | 5947   | 2.03 | 4579   | 1.39 |
| Glycerolipids[GL]        | 529  | 7.01 | 514    | 4.94 | 301    | 2.72 |
| Fatty Acyls[FA]          | 1794 | 2.89 | 2127   | 1.95 | 3089   | 3.48 |
| Sphingolipids[SP]        | 324  | 1.44 | 291    | 1.54 | 225    | 1.64 |
| Sterol Lipids[ST]        | 124  | 3.37 | 205    | 1.89 | 209    | 2.40 |
| Polyketides[PK]          | 373  | 1.08 | 218    | 1.43 | 307    | 1.60 |
| Prenol Lipids[PR]        | 162  | 3.28 | 156    | 6.81 | 120    | 4.32 |
| Saccharolipids[SL]       | 3    | 3.03 | 2      | 1.69 | 3      | 2.73 |
| POS                      |      |      |        |      |        |      |
| Glycerophospholipids[GP] | 7389 | 1.91 | 6040   | 1.39 | 6102   | 1.91 |
| Glycerolipids[GL]        | 3708 | 0.84 | 2917   | 1.03 | 4750   | 0.82 |
| Fatty Acyls[FA]          | 1656 | 1.07 | 1146   | 1.41 | 800    | 1.03 |
| Sphingolipids[SP]        | 593  | 1.74 | 686    | 2.80 | 313    | 1.23 |
| Sterol Lipids[ST]        | 399  | 1.90 | 311    | 1.74 | 215    | 1.61 |
| Polyketides[PK]          | 249  | 1.32 | 233    | 1.36 | 177    | 1.01 |
| Prenol Lipids[PR]        | 180  | 1.38 | 382    | 0.99 | 164    | 0.88 |
| Saccharolipids[SL]       | 9    | 1.82 | 7      | 1.60 | 9      | 1.10 |

Note: Correspond to Figure 6E. AR, average ratio (DEHP/CT ratio); DEHP, di(2-Ethylhexyl) phthalate; Hep-KO, hepatocyte-specific PPAR $\gamma$  knockout; LC, lipid counts; Mac-KO, macrophage-specific PPAR $\gamma$  knockout; NEG, negative ion mode; POS, positive ion mode.

**Table S38** Data for Figure 6F: Class constitution of lipid metabolites in livers from different mice models [lipid counts; average ratio (DEHP/CT ratio); provided as [Excel Table S38](#)].

**Table S39** Evaluation of mitochondrial OXPHOS, fatty acid uptake and LD in HepG2 cells treated with MEHP with/without specific inhibitors [Mean stain area ( $\mu\text{m}^2$ ); mean $\pm$ SD; n=5/treatment].

| <b>Determination</b> | <b>TMRE</b>                     | <b>BODIPY FL C12</b>          | <b>LD</b>                     |
|----------------------|---------------------------------|-------------------------------|-------------------------------|
| CT(DMSO)             | 20.96 $\pm$ 5.60                | 25.51 $\pm$ 2.65              | 14.53 $\pm$ 3.85              |
| MEHP                 | 59.46 $\pm$ 6.39***             | 49.27 $\pm$ 6.79***           | 33.93 $\pm$ 5.52***           |
| MEHP+IACS            | 11.90 $\pm$ 2.42 <sup>3</sup>   | 20.53 $\pm$ 4.90 <sup>3</sup> | 20.89 $\pm$ 2.51 <sup>2</sup> |
| MEHP+VLX             | 31.93 $\pm$ 9.49 <sup>3</sup>   | 28.90 $\pm$ 3.68 <sup>3</sup> | 22.05 $\pm$ 4.35 <sup>1</sup> |
| MEHP+3-NP            | 33.53 $\pm$ 8.19 <sup>3</sup>   | 25.03 $\pm$ 3.73 <sup>3</sup> | 15.63 $\pm$ 7.11 <sup>3</sup> |
| MEHP+IL-1RA          | 39.07 $\pm$ 5.34** <sup>3</sup> | 26.12 $\pm$ 6.19 <sup>3</sup> | 18.45 $\pm$ 7.00 <sup>2</sup> |

Note: Correspond to Figure 7A, 7B. 3-NP, 3-Nitropropanoic acid (2 mM); CT, vehicle control; DMSO, dimethyl sulfoxide; IACS, IACS-10759 (10 nM); IL-1RA (200 ng/ml); LD, lipid droplet; MEHP, mono-2-ethylhexyl phthalate (200  $\mu\text{M}$ ); OXPHOS, oxidative phosphorylation; TMRE, tetramethylrhodamine ethyl ester, mitochondrial membrane potential indicator; SD, standard deviation; VLX, VLX600 (1  $\mu\text{M}$ ). \* $p$ <0.05, \*\* $p$ <0.01, \*\*\* $p$ <0.001, relative to vehicle control; <sup>1</sup> $p$ <0.05, <sup>2</sup> $p$ <0.01, <sup>3</sup> $p$ <0.001, relative to MEHP treatment [analysis of variance (one-way ANOVA) with post hoc multiple comparison correction using Tukey's multiple comparisons test].

**Table S40** Evaluation of mitochondrial OXPHOS and LD in HepG2 cells treated with MEHP with/without M2 macrophages [Mean stain area ( $\mu\text{m}^2$ ); mean  $\pm$  SD; n=5/treatment].

| With/without M2 | Treatment | TMRE                            | MitoSOX                       | LD                            |
|-----------------|-----------|---------------------------------|-------------------------------|-------------------------------|
| HepG2           | CT(DMSO)  | 145.98 $\pm$ 3.62               | 51.79 $\pm$ 3.00              | 60.98 $\pm$ 4.32              |
| (without M2)    | MEHP      | 163.29 $\pm$ 3.05**             | 56.49 $\pm$ 1.79***           | 117.28 $\pm$ 17.67***         |
| Co-M2           | CT(DMSO)  | 129.66 $\pm$ 9.46               | 37.76 $\pm$ 2.30              | 59.38 $\pm$ 7.07              |
| (HepG2 with M2) | MEHP      | 140.69 $\pm$ 11.12 <sup>3</sup> | 37.27 $\pm$ 4.53 <sup>3</sup> | 88.42 $\pm$ 4.45 <sup>3</sup> |

Note: Correspond to Figure 7C. CT, vehicle control; DMSO, dimethyl sulfoxide; LD, lipid droplet; MEHP, mono-2-ethylhexyl phthalate (200  $\mu\text{M}$ ); mitoSOX, mitochondrial superoxide, mitochondrial reactive oxygen species indicator; OXPHOS, oxidative phosphorylation; TMRE, tetramethylrhodamine ethyl ester, mitochondrial membrane potential indicator; SD, standard deviation. \* $p$ <0.05, \*\* $p$ <0.01, \*\*\* $p$ <0.001, relative to vehicle control; <sup>1</sup> $p$ <0.05, <sup>2</sup> $p$ <0.01, <sup>3</sup> $p$ <0.001, relative to MEHP treatment [analysis of variance (two-way ANOVA) with post hoc multiple comparison correction using Tukey's multiple comparisons test].

**Table S41** Relative expression of DEGs associated with OXPHOS in HepG2 cells treated with MEHP with/without M2 macrophages [Z scores; n=2/treatment].

| DEGs            | HepG2 |       | MEHP-HepG2 |      | MEHP-HepG2-Co-M2 |       |
|-----------------|-------|-------|------------|------|------------------|-------|
|                 | R-1   | R-2   | R-1        | R-2  | R-1              | R-2   |
| <i>MT-ATP6</i>  | -0.34 | -0.06 | 1.68       | 0.53 | -0.63            | -1.17 |
| <i>MT-ND2</i>   | -0.13 | -0.03 | 1.43       | 0.84 | -1.16            | -0.95 |
| <i>MT-CYB</i>   | 0.09  | 0.15  | 1.27       | 0.78 | -0.94            | -1.36 |
| <i>MT-ND4L</i>  | -0.20 | 0.88  | 1.05       | 0.52 | -0.73            | -1.51 |
| <i>ATP6V0E2</i> | 0.44  | 0.34  | 1.03       | 0.57 | -0.72            | -1.67 |
| <i>MT-ND1</i>   | -0.80 | -0.73 | 1.69       | 0.72 | -0.30            | -0.59 |
| <i>MT-CO1</i>   | -1.00 | -0.77 | 1.65       | 0.44 | 0.30             | -0.62 |
| <i>MT-ND5</i>   | -0.68 | -1.05 | 1.38       | 0.64 | 0.59             | -0.88 |
| <i>MT-ND6</i>   | -1.02 | -1.23 | 1.36       | 0.42 | 0.63             | -0.15 |
| <i>MT-ATP8</i>  | 0.03  | -0.70 | 0.30       | 0.55 | 1.34             | -1.52 |
| <i>ATP6V0A2</i> | 0.34  | -0.01 | -0.58      | 1.74 | -0.28            | -1.20 |

Note: Correspond to Figure 7D. DEGs, differentially expressed genes; MEHP, mono-2-ethylhexyl phthalate (200  $\mu$ M); R, replicate.



**Table S42** Relative expression of DEGs associated with glycolysis in HepG2 cells treated with MEHP with/without M2 macrophages [Z scores; n=3/treatment].

| DEGs          | MEHP-HepG2 |       |       | MEHP-HepG2-Co-M2 |       |      |
|---------------|------------|-------|-------|------------------|-------|------|
|               | R-1        | R-2   | R-3   | R-1              | R-2   | R-3  |
| <i>ALDOC</i>  | -0.97      | -0.84 | -0.90 | 1.09             | 0.92  | 0.71 |
| <i>LDHA</i>   | -1.01      | -0.71 | -1.01 | 0.94             | 0.96  | 0.81 |
| <i>HK1</i>    | -1.40      | -0.53 | -0.67 | 0.91             | 0.72  | 0.98 |
| <i>ENO2</i>   | -1.02      | -0.49 | -1.08 | 0.76             | 1.29  | 0.55 |
| <i>ENO1</i>   | -0.93      | -0.66 | -1.03 | 0.98             | 1.23  | 0.42 |
| <i>PKM</i>    | -0.87      | -0.94 | -0.87 | 1.08             | 1.08  | 0.52 |
| <i>PGM1</i>   | -0.62      | -1.12 | -0.84 | 1.31             | 0.40  | 0.87 |
| <i>HK2</i>    | -0.39      | -1.12 | -0.84 | 1.30             | -0.05 | 1.09 |
| <i>PGK1</i>   | -0.59      | -0.99 | -0.69 | 1.37             | -0.22 | 1.12 |
| <i>TPI1</i>   | -0.84      | -0.68 | -1.11 | 1.12             | 1.08  | 0.43 |
| <i>GAPDH</i>  | -1.01      | -0.38 | -1.01 | 0.63             | 1.54  | 0.22 |
| <i>PFKL</i>   | -1.09      | -0.38 | -0.88 | 0.69             | 1.55  | 0.11 |
| <i>PFKP</i>   | -0.56      | -1.16 | -0.61 | 1.62             | 0.55  | 0.16 |
| <i>PFKFB4</i> | -0.92      | -0.80 | -1.01 | 0.95             | 0.90  | 0.88 |
| <i>PFKFB3</i> | -0.70      | -0.95 | -1.04 | 1.05             | 0.61  | 1.03 |
| <i>MPI</i>    | -1.14      | -0.64 | -0.71 | 0.69             | 1.49  | 0.32 |
| <i>ENOSF1</i> | -0.98      | -0.35 | -1.09 | 0.44             | 1.52  | 0.47 |
| <i>PFKFB1</i> | -1.00      | -0.51 | -1.00 | 0.19             | 1.27  | 1.04 |

Note: Correspond to Figure 7E. DEGs, differentially expressed genes; MEHP, mono-2-ethylhexyl phthalate (200  $\mu$ M); R, replicate.

**Table S43** Relative expression of DEGs associated with lipid metabolism in HepG2 cells treated with MEHP with/without M2 macrophages [Z scores; n=3/treatment].

| Pathways                | DEGs            | MEHP-HepG2 |       |      | MEHP-HepG2-Co-M2 |       |       |
|-------------------------|-----------------|------------|-------|------|------------------|-------|-------|
|                         |                 | R-1        | R-2   | R-3  | R-1              | R-2   | R-3   |
| Glycerolipid metabolism | <i>ALDH1B1</i>  | 1.16       | 0.43  | 0.88 | -0.23            | -1.38 | -0.86 |
|                         | <i>GPD1L</i>    | 0.83       | 0.17  | 0.98 | -0.22            | -1.81 | 0.04  |
|                         | <i>PCYT1A</i>   | 0.97       | 0.33  | 0.98 | -0.29            | -1.68 | -0.30 |
|                         | <i>GPD1</i>     | 0.94       | 0.79  | 0.86 | -1.27            | -0.31 | -1.02 |
|                         | <i>ETNK2</i>    | 0.21       | 0.66  | 1.50 | -0.94            | -1.13 | -0.31 |
|                         | <i>PCYT1B</i>   | 0.68       | 0.42  | 1.41 | -0.51            | -0.73 | -1.26 |
|                         | <i>ETNPPL</i>   | 0.83       | 0.90  | 0.75 | -0.56            | -0.33 | -1.58 |
|                         | <i>PLA2G12B</i> | 1.02       | 0.43  | 0.89 | -0.15            | -1.63 | -0.56 |
|                         | <i>PLA2G12A</i> | 1.22       | 0.09  | 0.92 | -1.33            | -0.93 | 0.03  |
|                         | <i>PLPP3</i>    | 1.06       | 0.30  | 0.78 | -0.22            | -1.76 | -0.17 |
|                         | <i>PLPP1</i>    | 0.71       | 0.98  | 0.98 | -0.70            | -1.24 | -0.74 |
|                         | <i>GPAM</i>     | 1.03       | 0.35  | 0.87 | -0.46            | -1.68 | -0.11 |
|                         | <i>AGPAT3</i>   | 1.27       | 0.69  | 0.67 | -0.60            | -1.07 | -0.97 |
|                         | <i>DGKK</i>     | 0.96       | 0.12  | 0.87 | -0.28            | -1.80 | 0.13  |
| Fatty acid metabolism   | <i>ADH6</i>     | 0.92       | 0.99  | 0.48 | -0.40            | -1.63 | -0.36 |
|                         | <i>ADH4</i>     | 0.72       | 0.85  | 1.05 | -0.38            | -1.26 | -0.97 |
|                         | <i>EHHADH</i>   | 0.89       | 0.28  | 0.64 | -0.08            | -1.92 | 0.18  |
|                         | <i>ACSL1</i>    | 1.04       | 0.15  | 0.77 | -0.08            | -1.82 | -0.06 |
|                         | <i>HACD2</i>    | 0.87       | 0.13  | 0.85 | -0.28            | -1.83 | 0.26  |
|                         | <i>FADS1</i>    | 0.82       | -0.19 | 0.99 | 0.14             | -1.81 | 0.05  |
|                         | <i>ICMT</i>     | 0.88       | 0.78  | 1.00 | -0.51            | -1.17 | -0.99 |
|                         | <i>IDII</i>     | 0.90       | 0.37  | 0.67 | -0.27            | -1.87 | 0.20  |
|                         | <i>HMGCR</i>    | 0.93       | 0.15  | 0.72 | 0.04             | -1.90 | 0.06  |
|                         | <i>ACAT2</i>    | 0.86       | 0.74  | 1.09 | -0.63            | -0.96 | -1.10 |
|                         | <i>HMGCS1</i>   | 1.02       | 0.10  | 0.73 | -0.03            | -1.85 | 0.03  |
|                         | <i>MCAT</i>     | 0.75       | 0.92  | 0.89 | -1.34            | -0.27 | -0.95 |
|                         | <i>FASN</i>     | 1.11       | 0.57  | 0.99 | -1.09            | -0.73 | -0.85 |

Note: Correspond to Figure 7F. DEGs, differentially expressed genes; MEHP, mono-2-ethylhexyl phthalate (200  $\mu$ M); R, replicate.

**Table S44** Body weight fluctuation in DEHP treated mice [g; mean  $\pm$  SD; n=10/group].

| Dose group | 0 mg/kg BW     | 625 mg/kg BW   | 1250 mg/kg BW  | 2500 mg/kg BW  |
|------------|----------------|----------------|----------------|----------------|
| Week 0     | 22.4 $\pm$ 1.2 | 23.1 $\pm$ 0.8 | 22.8 $\pm$ 1.2 | 22.9 $\pm$ 0.8 |
| Week 1     | 22.4 $\pm$ 1.1 | 23.4 $\pm$ 1.2 | 22.9 $\pm$ 0.8 | 23.1 $\pm$ 1.1 |
| Week 2     | 23.1 $\pm$ 1.3 | 22.7 $\pm$ 1.4 | 23.5 $\pm$ 1.2 | 22.8 $\pm$ 1.2 |
| Week 3     | 22.9 $\pm$ 1.2 | 23.4 $\pm$ 1.2 | 22.8 $\pm$ 1.1 | 22.5 $\pm$ 0.9 |
| Week 4     | 22.9 $\pm$ 1.1 | 24.0 $\pm$ 0.0 | 23.0 $\pm$ 1.0 | 22.0 $\pm$ 0.9 |

Note: Correspond to Figure S2A. BW, body weight; DEHP, di(2-Ethylhexyl) phthalate; SD, standard deviation. \* $p$ <0.05, \*\* $p$ <0.01, \*\*\* $p$ <0.001, relative to vehicle control [analysis of variance (one-way ANOVA) with post hoc multiple comparison correction using Dunnett's multiple comparisons test].

**Table S45** Data for Figure S2B: Enriched KEGG pathways (level 2) in DEHP treated mice [number of genes; provided as [Excel Table S45](#)].

**Table S46** Relative expression of DEGs associated with lipid metabolism in HepG2 cells treated with MEHP [Z scores; n=3/treatment].

| Pathways                | DEGs            | HepG2-CT |       |       | HepG2-MEHP |       |      |
|-------------------------|-----------------|----------|-------|-------|------------|-------|------|
|                         |                 | R-1      | R-2   | R-3   | R-1        | R-2   | R-3  |
| Glycerolipid metabolism | <i>PLA2G3</i>   | -1.03    | -0.18 | -1.25 | 0.51       | 0.68  | 1.27 |
|                         | <i>AGPAT2</i>   | -0.98    | -0.51 | -0.83 | -0.15      | 1.38  | 1.08 |
|                         | <i>LPCAT3</i>   | -1.07    | -0.31 | -0.85 | 1.14       | -0.21 | 1.30 |
|                         | <i>AKR1B10</i>  | -0.71    | -0.79 | -1.16 | 1.13       | 0.57  | 0.97 |
|                         | <i>PLA2G12A</i> | -1.13    | 0.52  | -0.51 | 1.35       | -0.94 | 0.71 |
|                         | <i>PLPP3</i>    | -0.82    | 0.54  | 0.15  | 1.34       | -1.46 | 0.25 |
|                         | <i>PLPP5</i>    | -0.69    | -1.26 | -0.36 | -0.02      | 1.39  | 0.93 |
|                         | <i>LPIN1</i>    | -0.59    | -1.50 | -0.05 | 1.16       | -0.05 | 1.02 |
| Fatty acid metabolism   | <i>FADS1</i>    | -0.85    | -0.96 | -0.78 | 1.08       | 0.29  | 1.22 |
|                         | <i>TECR</i>     | -0.44    | -0.62 | -0.76 | -0.58      | 1.75  | 0.66 |
|                         | <i>FASN</i>     | -1.16    | -0.49 | -0.94 | 1.16       | 0.43  | 1.00 |
|                         | <i>ACADVL</i>   | -0.81    | -0.88 | -0.86 | 0.53       | 1.50  | 0.53 |
|                         | <i>ACAT2</i>    | -0.81    | -1.06 | -0.84 | 0.87       | 0.75  | 1.09 |
|                         | <i>ACAA2</i>    | -1.11    | -1.21 | -0.13 | 1.10       | 0.96  | 0.38 |
|                         | <i>FDPS</i>     | -0.75    | -0.88 | -1.04 | 1.20       | 0.90  | 0.57 |
|                         | <i>MVD</i>      | -0.97    | -0.83 | -0.86 | 0.69       | 1.32  | 0.65 |
|                         | <i>ID11</i>     | -0.72    | -0.99 | -0.87 | 1.34       | 0.34  | 0.91 |
|                         | <i>HMGCR</i>    | -0.42    | -0.65 | -0.17 | 1.57       | -1.13 | 0.79 |
|                         | <i>MVK</i>      | -0.80    | -0.79 | -1.06 | 0.61       | 1.31  | 0.73 |
| Steroid biosynthesis    | <i>EBP</i>      | -0.52    | -0.96 | -0.70 | 0.03       | 1.78  | 0.38 |
|                         | <i>DHCR7</i>    | -0.89    | -0.81 | -1.03 | 0.89       | 0.90  | 0.94 |
|                         | <i>SQLE</i>     | -0.78    | -0.89 | -0.83 | 1.33       | 0.10  | 1.07 |
|                         | <i>MSMO1</i>    | -0.71    | -0.98 | -0.91 | 1.40       | 0.68  | 0.51 |
|                         | <i>NSDHL</i>    | -0.32    | -1.01 | -1.02 | 0.73       | 1.51  | 0.10 |
|                         | <i>TM7SF2</i>   | -1.09    | -0.64 | -0.62 | 0.39       | 1.67  | 0.28 |
|                         | <i>SC5D</i>     | -0.77    | -1.26 | -0.19 | 1.41       | -0.09 | 0.89 |
|                         | <i>HSD17B7</i>  | -0.29    | -1.05 | -1.20 | 0.47       | 1.10  | 0.97 |
|                         | <i>AKRIC2</i>   | -0.89    | -0.84 | -0.77 | 0.20       | 1.48  | 0.83 |
|                         | <i>AKRIC1</i>   | -1.02    | -1.09 | -0.43 | 0.31       | 1.23  | 1.00 |
|                         | <i>CYP11A1</i>  | -0.89    | -0.85 | -0.91 | 0.56       | 0.75  | 1.33 |

Note: Correspond to Figure S2C. DEGs, differentially expressed genes; MEHP, mono-2-ethylhexyl phthalate (200  $\mu$ M); R, replicate.

**Table S47** Relative expression of DEGs associated with PPAR pathway in DEHP treated mice [Z scores; n=6/group; provided as [Excel Table S47](#)].

**Table S48** Pathway enrichment analysis of DEGs in HepG2 cells treated with MEHP [n=3/treatment].

| <b>Pathway</b>                          | <b>Counts</b> | <b>Gene Ratio</b> | <b><i>P</i>adj</b> |
|-----------------------------------------|---------------|-------------------|--------------------|
| Fatty acid metabolism                   | 12            | 12/155            | 2.30E-07           |
| PPAR signaling pathway                  | 11            | 11/155            | 5.25E-05           |
| Ferroptosis                             | 8             | 8/155             | 0.00029333         |
| Biosynthesis of unsaturated fatty acids | 6             | 6/155             | 0.000666895        |
| Terpenoid backbone biosynthesis         | 6             | 6/155             | 0.000746958        |
| Fatty acid degradation                  | 7             | 7/155             | 0.002394125        |
| Peroxisome                              | 9             | 9/155             | 0.006369618        |

Note: Correspond to Figure S2E. DEGs, differentially expressed genes; MEHP, mono-2-ethylhexyl phthalate (200  $\mu$ M).

**Table S49** Clinical chemistry panel in WT and Mac-KO mice [mean  $\pm$  SD (n)].

| Measurements | Treatment | CMC                   | DEHP                                |
|--------------|-----------|-----------------------|-------------------------------------|
| TG(mM)       | WT        | 0.68 $\pm$ 0.07 (5)   | 0.38 $\pm$ 0.10 (5)**               |
|              | Mac-KO    | 0.60 $\pm$ 0.11 (5)   | 0.66 $\pm$ 0.05 (5) <sup>a</sup>    |
| CHO(mM)      | WT        | 1.14 $\pm$ 0.07 (5)   | 2.08 $\pm$ 0.30 (5)***              |
|              | Mac-KO    | 1.37 $\pm$ 0.07 (3)   | 1.77 $\pm$ 0.14 (4) <sup>a</sup>    |
| CHE(mM)      | WT        | 2.97 $\pm$ 0.38 (5)   | 4.07 $\pm$ 0.30(5)***               |
|              | Mac-KO    | 3.34 $\pm$ 0.19 (3)   | 3.82 $\pm$ 0.15 (5)                 |
| ALP(U/L)     | WT        | 102.83 $\pm$ 7.57 (5) | 150.86 $\pm$ 23.18 (5)***           |
|              | Mac-KO    | 113.00 $\pm$ 2.00 (3) | 118.33 $\pm$ 16.99 (5) <sup>a</sup> |
| HDL(mM)      | WT        | 0.71 $\pm$ 0.07 (5)   | 1.23 $\pm$ 0.19 (5)***              |
|              | Mac-KO    | 0.88 $\pm$ 0.05 (3)   | 1.12 $\pm$ 0.09 (5)                 |
| LDL(mM)      | WT        | 1.47 $\pm$ 0.03 (5)   | 1.76 $\pm$ 0.24 (5)**               |
|              | Mac-KO    | 1.53 $\pm$ 0.02 (3)   | 1.66 $\pm$ 0.10 (5)                 |

Note: Correspond to Figure S4A. ALP, alkaline phosphatase; CHE, cholinesterase; CHO, cholesterol; CMC, sodium carboxymethylcellulose, vehicle control; DEHP, di(2-Ethylhexyl) phthalate; HDL, high-density lipoprotein cholesterol; LDL, low-density lipoprotein cholesterol; Mac-KO, macrophage-specific PPAR $\gamma$  knockout; SD, standard deviation; TG, triglycerides; U/L, units per liter; WT, wild type. \* $p$ <0.05, \*\* $p$ <0.01, \*\*\* $p$ <0.001, relative to vehicle control; <sup>a</sup> $p$ <0.05, <sup>b</sup> $p$ <0.01, <sup>c</sup> $p$ <0.001, relative to WT DEHP [analysis of variance (two-way ANOVA) with post hoc multiple comparison correction using Bonferroni's multiple comparisons test].

**Table S50** Macrophages and neutrophils analysis in liver of WT and Mac-KO mice using flow cytometry [% of CD45<sup>+</sup> cells; mean ± SD (n)].

|                                                              | <b>Treatment</b> | <b>CMC</b>     | <b>DEHP</b>                    |
|--------------------------------------------------------------|------------------|----------------|--------------------------------|
| CD11b <sup>high</sup> F4/80 <sup>low</sup><br>Macrophages    | WT               | 8.89±1.00 (5)  | 12.80±0.94 (5) <sup>***</sup>  |
|                                                              | Mac-KO           | 4.83±0.43 (5)  | 9.47±1.35 (5) <sup>***,b</sup> |
| CD11b <sup>low</sup> F4/80 <sup>high</sup><br>Macrophages    | WT               | 24.94±3.93 (5) | 21.74±3.50 (5) <sup>*</sup>    |
|                                                              | Mac-KO           | 27.30±2.48 (5) | 31.22±2.78 (5) <sup>b</sup>    |
| CD11b <sup>high</sup> F4/80-Ly6g <sup>+</sup><br>Neutrophils | WT               | 4.89±1.89 (5)  | 4.19±0.25 (5)                  |
|                                                              | Mac-KO           | 3.66±1.01 (4)  | 4.10±2.03 (5)                  |

Note: Correspond to Figure S4B. CMC, sodium carboxymethylcellulose, vehicle control; DEHP, di(2-Ethylhexyl) phthalate; Mac-KO, macrophage-specific PPAR $\gamma$  knockout; SD, standard deviation; WT, wild type. <sup>\*</sup> $p$ <0.05, <sup>\*\*</sup> $p$ <0.01, <sup>\*\*\*</sup> $p$ <0.001, relative to vehicle control; <sup>a</sup> $p$ <0.05, <sup>b</sup> $p$ <0.01, <sup>c</sup> $p$ <0.001, relative to WT DEHP [analysis of variance (two-way ANOVA) with post hoc multiple comparison correction using Tukey's multiple comparisons test].

**Table S51** Macrophages featured cytokines analysis in liver of WT and Mac-KO mice using flow cytometry [pg/mg protein; mean  $\pm$  SD; n=5].

| Subtype        | Cytokine | Treatment | CMC               | DEHP                          |
|----------------|----------|-----------|-------------------|-------------------------------|
| M1 macrophages | IL-12p70 | WT        | 8.61 $\pm$ 2.90   | 23.73 $\pm$ 4.30***           |
|                |          | Mac-KO    | 11.45 $\pm$ 3.22  | 12.43 $\pm$ 2.08 <sup>b</sup> |
|                | IL-18    | WT        | 39.53 $\pm$ 10.10 | 63.02 $\pm$ 7.30***           |
|                |          | Mac-KO    | 54.88 $\pm$ 7.96  | 36.13 $\pm$ 9.30 <sup>b</sup> |
| M2 macrophages | IL-10    | WT        | 77.52 $\pm$ 7.39  | 52.44 $\pm$ 6.31***           |
|                |          | Mac-KO    | 67.11 $\pm$ 4.54  | 62.22 $\pm$ 5.66              |
|                | IL-23    | WT        | 33.07 $\pm$ 5.48  | 24.05 $\pm$ 4.04**            |
|                |          | Mac-KO    | 30.91 $\pm$ 1.15  | 32.41 $\pm$ 3.52 <sup>c</sup> |

Note: Correspond to Figure S4C. CMC, sodium carboxymethylcellulose, vehicle control; DEHP, di(2-Ethylhexyl) phthalate; Mac-KO, macrophage-specific PPAR $\gamma$  knockout; SD, standard deviation; WT, wild type. \* $p$ <0.05, \*\* $p$ <0.01, \*\*\* $p$ <0.001, relative to vehicle control; <sup>a</sup> $p$ <0.05, <sup>b</sup> $p$ <0.01, <sup>c</sup> $p$ <0.001, relative to WT DEHP [analysis of variance (two-way ANOVA) with post hoc multiple comparison correction using Tukey's multiple comparisons test].



**Table S52** CD69<sup>+</sup> M1 macrophages evaluation in BMDM from WT and Mac-KO mice [mean stain area ( $\mu\text{m}^2$ ); mean $\pm$ SD (n)].

| <b>Treatment</b> | <b>CT(DMSO)</b>         | <b>DEHP</b>             | <b>MEHP</b>             |
|------------------|-------------------------|-------------------------|-------------------------|
| WT               | 131.62 $\pm$ 10.59 (11) | 126.57 $\pm$ 13.17 (14) | 121.86 $\pm$ 12.28 (11) |
| Mac-KO           | 129.17 $\pm$ 17.18 (12) | 117.85 $\pm$ 13.47 (12) | 133.54 $\pm$ 15.80 (9)  |

Note: Correspond to Figure S5B. n, technical replicates. CT, vehicle control; DEHP, di(2-Ethylhexyl) phthalate; DMSO, dimethyl sulfoxide; Mac-KO, macrophage-specific PPAR $\gamma$  knockout; MEHP, mono-2-ethylhexyl phthalate; SD, standard deviation; WT, wild type. \* $p$ <0.05, \*\* $p$ <0.01, \*\*\* $p$ <0.001, relative to vehicle control; <sup>a</sup> $p$ <0.05, <sup>b</sup> $p$ <0.01, <sup>c</sup> $p$ <0.001, relative to WT DEHP or WT MEHP [analysis of variance (two-way ANOVA) with post hoc multiple comparison correction using Bonferroni's multiple comparisons test].

**Table S53** Relative expression of DEGs associated with M1 macrophages in MEHP treated macrophages [Z scores; n=3/treatment; provided as Excel Table S53].

**Table S54** Macrophages lipid metabolism analysis in liver of WT and Mac-KO mice using flow cytometry [% of CD45<sup>+</sup> cells; mean  $\pm$  SD; n=5/treatment].

|                      | <b>Treatment</b> | <b>CMC</b>       | <b>DEHP</b>                   |
|----------------------|------------------|------------------|-------------------------------|
| CD36 <sup>high</sup> | WT               | 6.77 $\pm$ 2.86  | 8.67 $\pm$ 2.50               |
| Macrophages          | Mac-KO           | 7.55 $\pm$ 1.24  | 14.30 $\pm$ 2.80 <sup>a</sup> |
| LD <sup>high</sup>   | WT               | 13.26 $\pm$ 2.23 | 12.09 $\pm$ 2.06              |
| Macrophages          | Mac-KO           | 13.90 $\pm$ 0.87 | 19.24 $\pm$ 2.66 <sup>c</sup> |

Note: Correspond to Figure S5D. CMC, sodium carboxymethylcellulose, vehicle control; DEHP, di(2-Ethylhexyl) phthalate; Mac-KO, macrophage-specific PPAR $\gamma$  knockout; SD, standard deviation; WT, wild type. \* $p$ <0.05, \*\* $p$ <0.01, \*\*\* $p$ <0.001, relative to vehicle control; <sup>a</sup> $p$ <0.05, <sup>b</sup> $p$ <0.01, <sup>c</sup> $p$ <0.001, relative to WT DEHP [analysis of variance (two-way ANOVA) with post hoc multiple comparison correction using Tukey's multiple comparisons test].

# Supplemental Figures

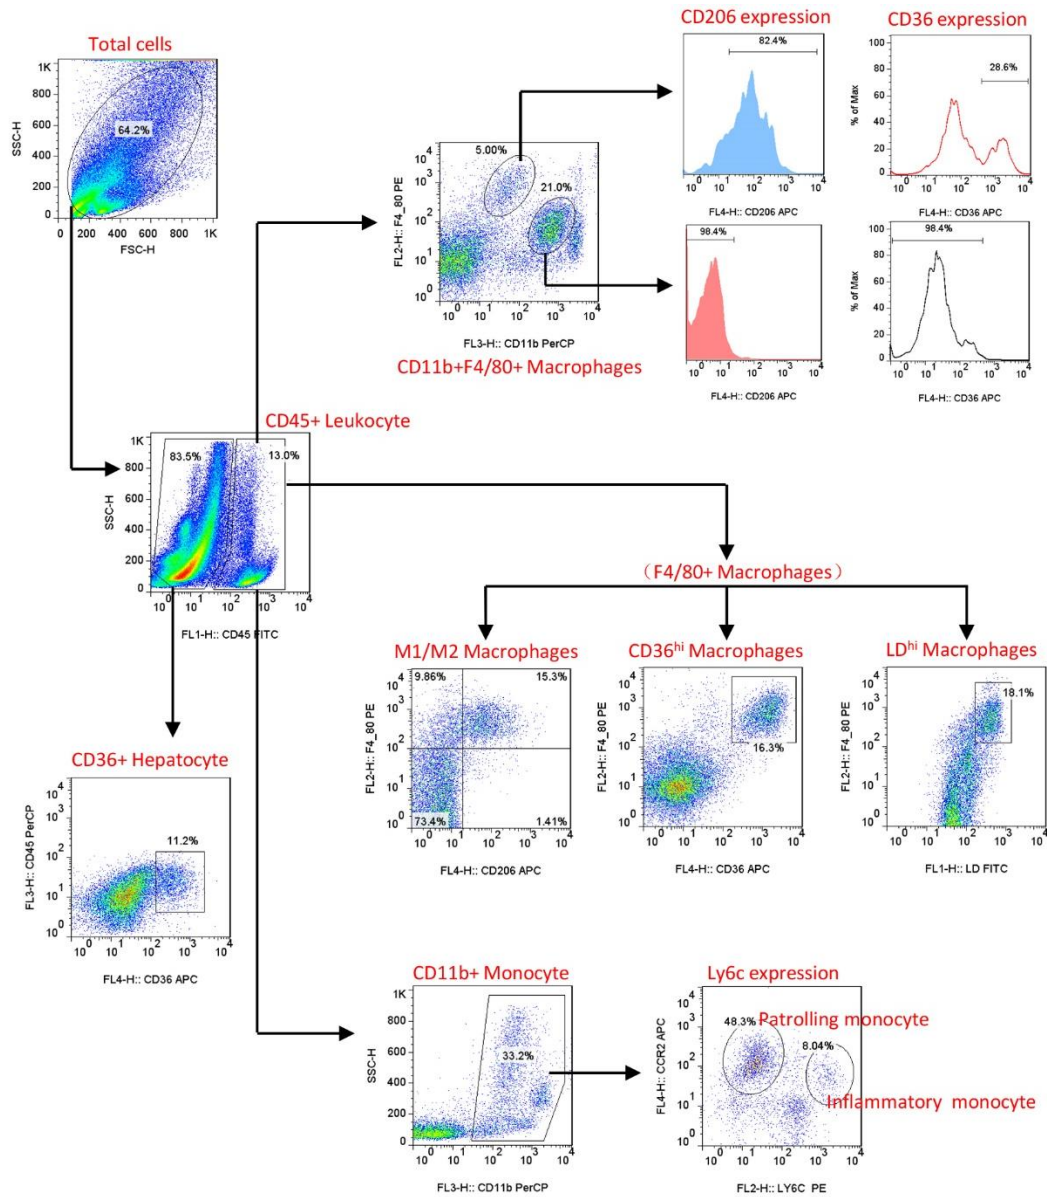

**Figure S1. Gating strategy for flow cytometry of mouse liver.**

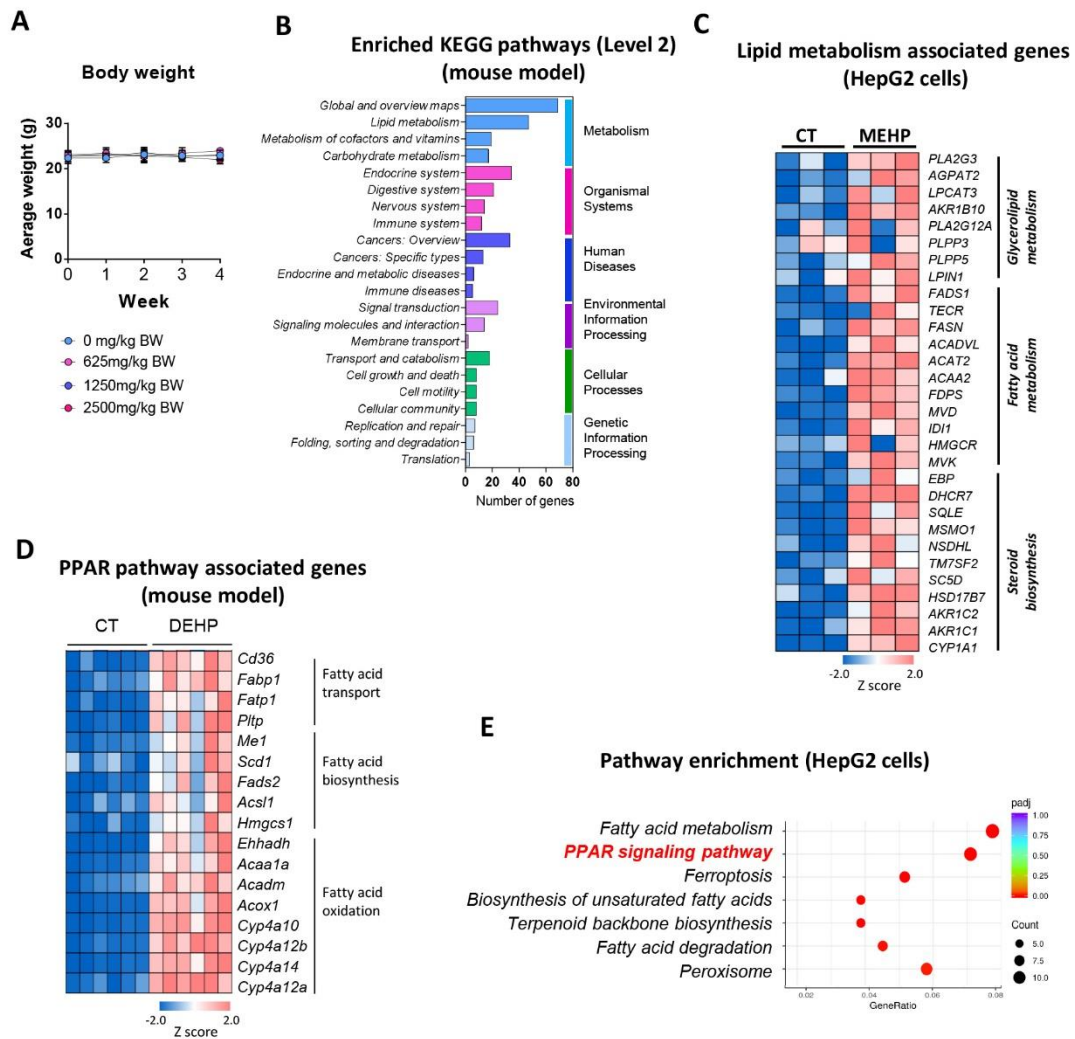

**Figure S2. The effect of DEHP on hepatic lipid metabolism.**

(A) Body weight of mice in the dose-response study of DEHP. C57BL/6J male mice were treated with 0.5% (wt/vol) sodium carboxymethylcellulose (CMC, vehicle control) or different doses of DEHP (625, 1250, and 2500 mg/kg bw) by daily gavage for 28 days. Data were expressed as mean  $\pm$  SD (n=10/group). The data for Figure S2A are located in Table S44.

(B) Kyoto Encyclopedia of Genes and Genomes (KEGG) pathway enrichment (level 2) of differentially expressed genes (DEGs) from livers of mice treated with CMC (vehicle control, CT) or DEHP (625 mg/kg bw) for 28 days (n=6/group). The data for

Figure S2B are located in Table S45.

(C) Heatmap of gene expression associated with PPAR signaling pathway in HepG2 cells. The cells were treated with MEHP (200  $\mu$ M) for 24 h in triplicate wells (n=3/treatment). After treatment, cells were collected for RNA sequencing. The data for Figure S2C are located in Table S46.

(D) Heatmap of gene expression associated with PPAR signaling pathway in mice model. C57BL/6J male mice treated with CMC (vehicle control, CT) or DEHP (625 mg/kg bw) for 28 days (n=6/group). The data for Figure S2D are located in Table S47.

(E) KEGG pathway enrichment for the HepG2 model. The cells were treated with MEHP (200  $\mu$ M) for 24 h in triplicate wells (n=3/treatment). After treatment, cells were collected for RNA sequencing. The data for Figure S2E are located in Table S48.

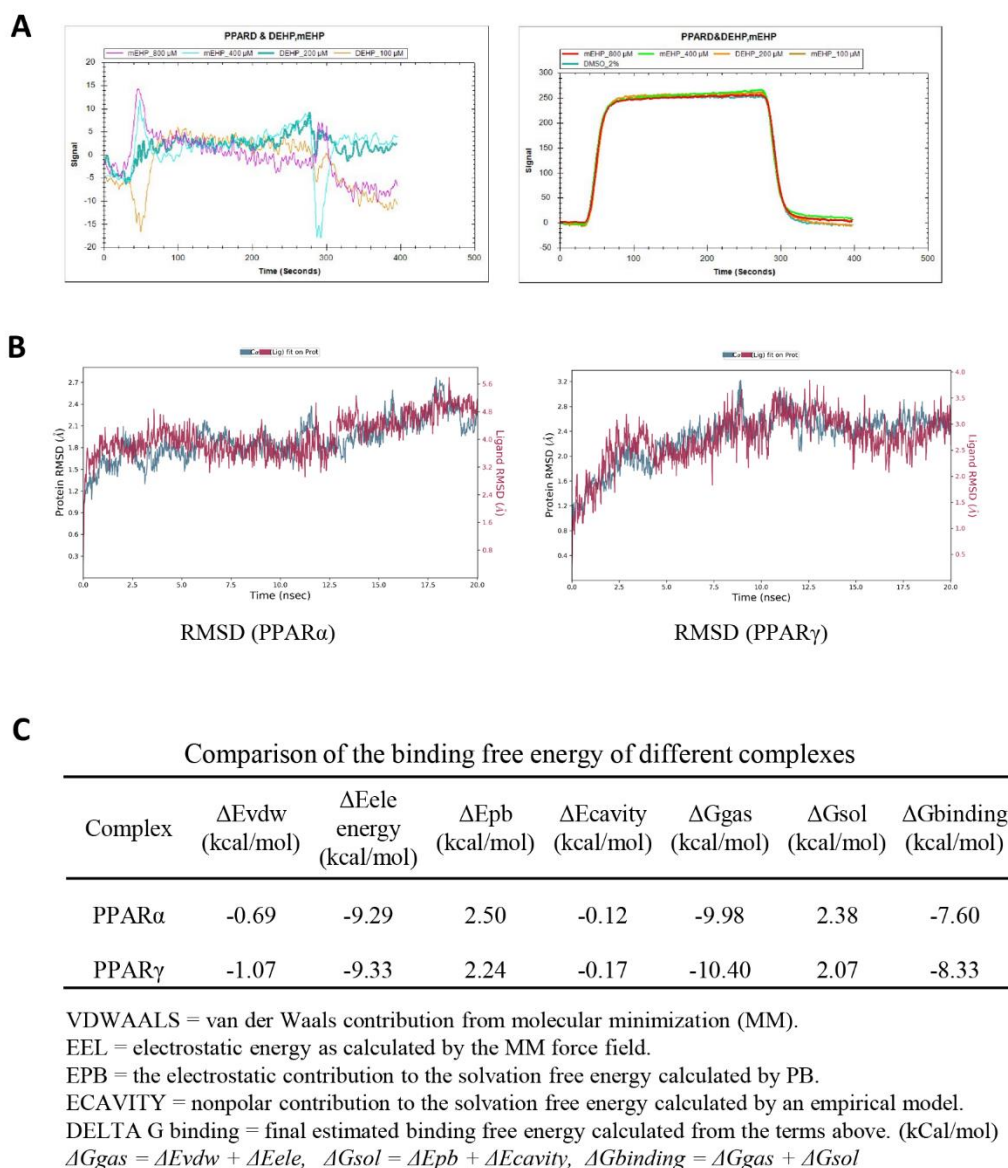

**Figure S3. Activation of PPAR isoforms by DEHP and MEHP at the molecular level.**

(A) Sensorgram showing the binding response of PPAR $\delta$  with DEHP or MEHP as determined by surface plasmon resonance (SPR) analysis.

(B) Root mean square deviation (RMSD) plots showing the stability of optimal docking complex.

(C) The binding free energy of MEHP with PPAR $\alpha$  and PPAR $\gamma$  in molecular docking and simulation.

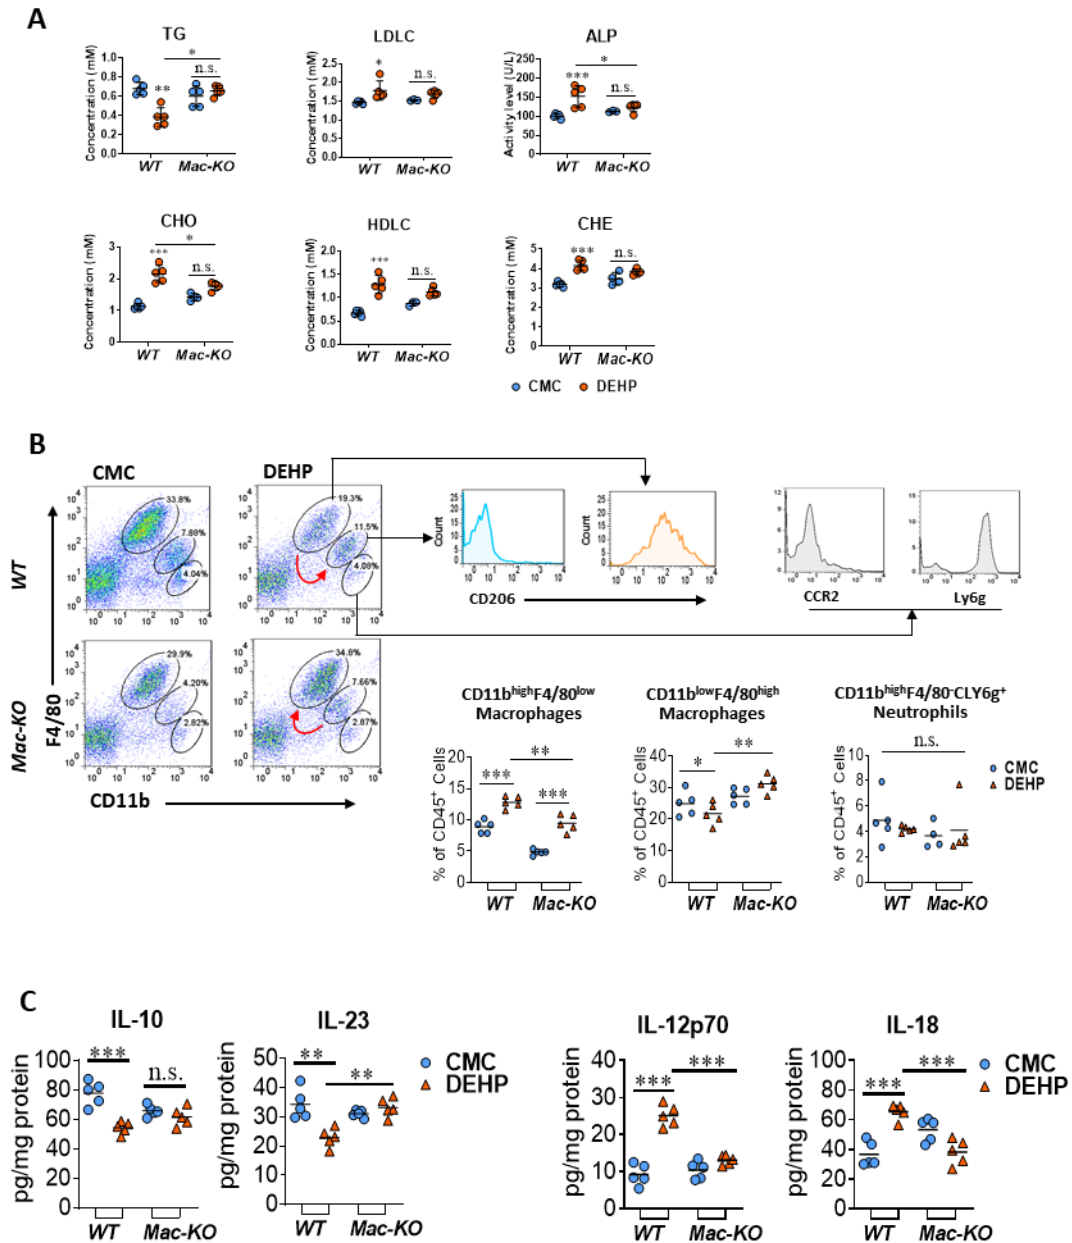

**Figure S4. The function of PPAR $\gamma$  in hepatic macrophages.**

Wild-type (WT, n=5/group) and macrophage-specific PPAR $\gamma$  knockout (Mac-KO, n=5/group) C57BL/6J male mice were treated with 0.5% (wt/vol) sodium carboxymethylcellulose (CMC, vehicle control) or DEHP (625 mg/kg bw) by daily gavage for 28 days.

(A) Plasma level of triglyceride (TG), cholesterol (CHO), high-density lipoprotein cholesterol (HDLC), low-density lipoprotein cholesterol (LDLC), alkaline phosphatase

(ALP), and cholinesterase (CHE) of WT and Mac-KO mice at the end of the treatment.

The data for Figure S4A are located in Table S49.

(B) Representative flow cytometry gating graphs and quantification of macrophages and neutrophils in the liver of WT or Mac-KO mice at the end of the treatment. An unusual observation (outlier) was excluded in the Mac-KO-CMC group. The data for Figure S4B are located in Table S50.

(C) Quantification of cytokines IL-10 and IL-23, IL-12p70 and IL-18 in the liver of WT or Mac-KO mice at the end of the treatment (n=5/group). The data for Figure S4C are located in Table S51.

Data are represented as mean  $\pm$  SD; \*p < 0.05, \*\*p < 0.01, \*\*\*p < 0.001, n.s, no significance, relative to vehicle control or WT DEHP; Two-way ANOVA with Turkey's post-test.



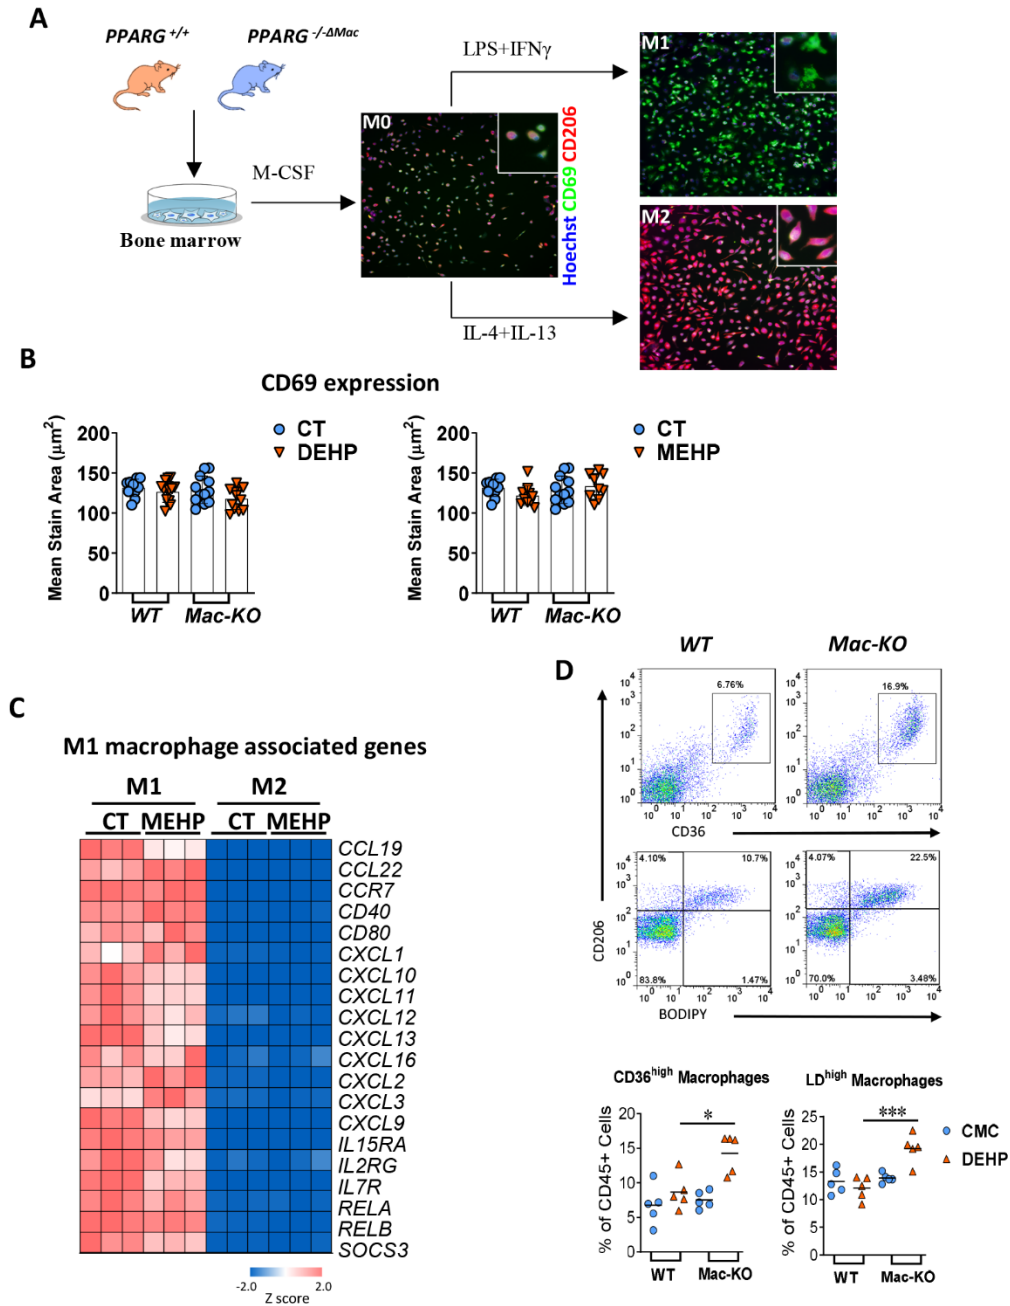

**Figure S5. The effects of DEHP and MEHP on Macrophages polarization.**

(A) Experimental scheme of polarization model with the bone marrow derived macrophages (BMDMs).

(B) Quantification of CD69 (M1 marker) expression in BMDMs from WT or Mac-KO mice. BMDMs were isolated from the Wild-type (WT, n=5/group) and macrophage-specific PPAR $\gamma$  knockout (Mac-KO, n=5/group) C57BL/6J male mice. BMDMs were

treated with 0.1% DMSO control (CT), DEHP (200  $\mu$ M) or MEHP (200  $\mu$ M) in combination with lipopolysaccharide (LPS, 100 ng/ml) and recombinant murine IFN- $\gamma$  (50 ng/ml) for 24 h in triplicate wells (the plots contains all technical replicates from 3-5 imaging sites of each well). Cells with positive stain of CD69 were acquired with ImageXpress system and normalized to the total cells in each of the replicate wells. The data for Figure S5B are located in Table S52.

(C) Heatmap of M1 marker genes expression in THP-1 derived macrophages. THP-1 derived M0 macrophages were treated with MEHP (200  $\mu$ M) during the induction of M1 and M2 polarization. Cells from triplicate wells (n=3) were analyzed with RNA sequencing at the end of the treatment. The data for Figure S5C are located in Table S53.

(D) Representative flow cytometry gating graphs and quantification of CD36 expression and lipid droplets (LD) level in hepatic macrophages of WT and Mac-KO mice model. Wild-type (WT, n=5/group) and macrophage-specific PPAR $\gamma$  knockout (Mac-KO, n=5/group) C57BL/6J male mice were treated with 0.5% (wt/vol) sodium carboxymethylcellulose (CMC, vehicle control) or DEHP (625 mg/kg bw) by daily gavage for 28 days. The data for Figure S5D are located in Table S54.

Data are represented as mean  $\pm$  SD; \*p < 0.05, \*\*p < 0.01, \*\*\*p < 0.001, n.s, no significance, relative to vehicle control or WT DEHP; Two-way ANOVA with Bonferroni's post-test.
